# Supplementary material for: Oral cannabinoid-rich THC/CBD cannabis extract for secondary prevention of chemotherapy-induced nausea and vomiting: a study protocol for a pilot and definitive randomised double-blind placebo-controlled trial (CannabisCINV)
Source: PubMed Central journal article supplement — BMJ Open. 2018 Sep 12;8(9):e020745. doi: 10.1136/bmjopen-2017-020745 (PMC6144412; doi:10.1136/bmjopen-2017-020745), 2018-09-12
Supplement: bmjopen-2017-020745.draft_revisions.pdf [file bmjopen-2017-020745.draft_revisions.pdf]

# BMJ Open

BMJ Open is committed to open peer review. As part of this commitment we make the peer review history of every article we publish publicly available.

When an article is published we post the peer reviewers' comments and the authors' responses online. We also post the versions of the paper that were used during peer review. These are the versions that the peer review comments apply to.

The versions of the paper that follow are the versions that were submitted during the peer review process. They are not the versions of record or the final published versions. They should not be cited or distributed as the published version of this manuscript.

BMJ Open is an open access journal and the full, final, typeset and author-corrected version of record of the manuscript is available on our site with no access controls, subscription charges or pay-per-view fees (<http://bmjopen.bmj.com>).

If you have any questions on BMJ Open's open peer review process please email [info.bmjopen@bmj.com](mailto:info.bmjopen@bmj.com)

# BMJ Open

## Oral cannabinoid-rich THC/CBD cannabis extract for secondary prevention of chemotherapy-induced nausea and vomiting: a study protocol for a pilot and definitive randomised double-blind placebo-controlled trial (CannabisCINV)

|                               |                                                                                                                                                                                                                                                                                                                                                                                                                                                                                                                                                                                                                                                                                                                                                                                                                                                                                                                                                                                                                                                                                                                                                                                                                                                                                                                                                                                                                                                                                                                                                                                                                                                                                                                                                                                                                                                                                                                                                                                                                                                                                                                                                |
|-------------------------------|------------------------------------------------------------------------------------------------------------------------------------------------------------------------------------------------------------------------------------------------------------------------------------------------------------------------------------------------------------------------------------------------------------------------------------------------------------------------------------------------------------------------------------------------------------------------------------------------------------------------------------------------------------------------------------------------------------------------------------------------------------------------------------------------------------------------------------------------------------------------------------------------------------------------------------------------------------------------------------------------------------------------------------------------------------------------------------------------------------------------------------------------------------------------------------------------------------------------------------------------------------------------------------------------------------------------------------------------------------------------------------------------------------------------------------------------------------------------------------------------------------------------------------------------------------------------------------------------------------------------------------------------------------------------------------------------------------------------------------------------------------------------------------------------------------------------------------------------------------------------------------------------------------------------------------------------------------------------------------------------------------------------------------------------------------------------------------------------------------------------------------------------|
| Journal:                      | <i>BMJ Open</i>                                                                                                                                                                                                                                                                                                                                                                                                                                                                                                                                                                                                                                                                                                                                                                                                                                                                                                                                                                                                                                                                                                                                                                                                                                                                                                                                                                                                                                                                                                                                                                                                                                                                                                                                                                                                                                                                                                                                                                                                                                                                                                                                |
| Manuscript ID                 | bmjopen-2017-020745                                                                                                                                                                                                                                                                                                                                                                                                                                                                                                                                                                                                                                                                                                                                                                                                                                                                                                                                                                                                                                                                                                                                                                                                                                                                                                                                                                                                                                                                                                                                                                                                                                                                                                                                                                                                                                                                                                                                                                                                                                                                                                                            |
| Article Type:                 | Protocol                                                                                                                                                                                                                                                                                                                                                                                                                                                                                                                                                                                                                                                                                                                                                                                                                                                                                                                                                                                                                                                                                                                                                                                                                                                                                                                                                                                                                                                                                                                                                                                                                                                                                                                                                                                                                                                                                                                                                                                                                                                                                                                                       |
| Date Submitted by the Author: | 31-Dec-2017                                                                                                                                                                                                                                                                                                                                                                                                                                                                                                                                                                                                                                                                                                                                                                                                                                                                                                                                                                                                                                                                                                                                                                                                                                                                                                                                                                                                                                                                                                                                                                                                                                                                                                                                                                                                                                                                                                                                                                                                                                                                                                                                    |
| Complete List of Authors:     | <p>Mersiades, Antony; University of Sydney, NHMRC Clinical Trials Centre<br/> Tognela, Annette; South Western Sydney Local Health District, Macarthur Cancer Therapy Centre, Campbelltown Hospital<br/> Haber, Paul; University of Sydney - Camperdown and Darlington Campus, Discipline of Addiction medicine; Sydney Local Health District, Drug Health Services<br/> Stockler, Martin; University of Sydney , NHMRC Clinical Trials Centre; Sydney Local Health District, Dept of Medical Oncology, Concord Cancer Care Centre<br/> Lintzeris, Nicholas; South East Sydney Local Health District, The Langton Centre; University of Sydney - Camperdown and Darlington Campus, Discipline of Addiction Medicine<br/> Simes, John; University of Sydney, NHMRC Clinical Trials Centre; Chris O'Brien Lifehouse, Dept of Medical Oncology<br/> McGregor, Iain; University of Sydney, Lambert Initiative for Cannabinoid Therapeutics<br/> Olver, Ian; University of South Australia, Sansom Institute for Health Research<br/> Allsop, David; University of Sydney, Lambert Initiative for Cannabinoid Therapeutics<br/> Gedye, Craig; Calvary Mater Newcastle, Dept of Medical Oncology<br/> Kirby, Adrienne; University of Sydney, NHMRC Clinical Trials Centre<br/> Morton, Rachael; The University of Sydney, NHMRC Clinical Trials Centre<br/> Fox, Peter; Orange Health Service, Central West Cancer Care Centre<br/> Clarke, Stephen; North Sydney Local Health District, Dept of Medical Oncology, Royal North Shore Hospital; Kolling Institute of Medical Research<br/> Briscoe, Karen; Mid North Coast Local Health District, Mid North Coast Cancer Institute<br/> Aghmesheh, Morteza; Illawarra Shoalhaven Local Health District, Illawarra Shoalhaven Cancer and Haematology Network, Wollongong Hospital<br/> Wong, Nicole; University of Sydney, NHMRC Clinical Trials Centre<br/> Walsh, Anna; University of Sydney, NHMRC Clinical Trials Centre<br/> Hahn, Carmel; Chris O'Brien Lifehouse<br/> Grimison, Peter; University of Sydney, NHMRC Clinical Trials Centre; Chris O'Brien Lifehouse, Dept of Medical Oncology</p> |
| Keywords:                     | Cannabis, Cannabidiol, Chemotherapy-induced nausea and vomiting, Randomized trial, Antiemetic, Marijuana                                                                                                                                                                                                                                                                                                                                                                                                                                                                                                                                                                                                                                                                                                                                                                                                                                                                                                                                                                                                                                                                                                                                                                                                                                                                                                                                                                                                                                                                                                                                                                                                                                                                                                                                                                                                                                                                                                                                                                                                                                       |

1  
2  
3  
4  
5  
6  
7  
8  
9  
10  
11  
12  
13  
14  
15  
16  
17  
18  
19  
20  
21  
22  
23  
24  
25  
26  
27  
28  
29  
30  
31  
32  
33  
34  
35  
36  
37  
38  
39  
40  
41  
42  
43  
44  
45  
46  
47  
48  
49  
50  
51  
52  
53  
54  
55  
56  
57  
58  
59  
60

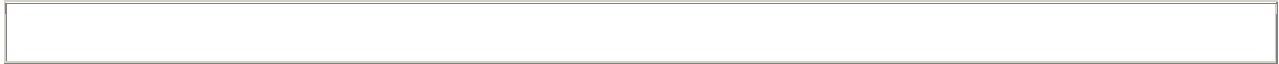

SCHOLARONE™  
Manuscripts

For peer review only

# Oral cannabinoid-rich THC/CBD cannabis extract for secondary prevention of chemotherapy-induced nausea and vomiting: a study protocol for a pilot and definitive randomised double-blind placebo-controlled trial (CannabisCINV)

Antony Mersiades<sup>1</sup>, Annette Tognela<sup>2</sup>, Paul S Haber<sup>3,4</sup>, Martin Stockler<sup>1,5,6</sup>, Nicholas Lintzeris<sup>3,7</sup>, John Simes<sup>1,5</sup>, Iain McGregor<sup>8</sup>, Ian Olver<sup>9</sup>, David J Allsop<sup>8</sup>, Craig Gedye<sup>10</sup>, Adrienne Kirby<sup>1</sup>, Rachael L Morton<sup>1</sup>, Peter Fox<sup>11</sup>, Stephen Clarke<sup>12,13</sup>, Karen Briscoe<sup>14</sup>, Morteza Aghmesheh<sup>15</sup>, Nicole Wong<sup>1</sup>, Anna Walsh<sup>1</sup>, Carmel Hahn<sup>5</sup>, Peter Grimison<sup>1,5</sup>

**Author** Dr Antony J Mersiades

**Co-authors** Dr Annette Tognela, Prof Paul S Haber, Prof Martin Stockler, Prof Nicholas Lintzeris, Prof John Simes, Prof Iain McGregor, Prof Ian Olver, Dr David J Allsop, Prof Craig Gedye, Ms Adrienne Kirby, Dr Rachael L Morton, Dr Peter Fox, Prof Stephen Clarke, Dr Karen Briscoe, Dr Morteza Aghmesheh, Ms Nicole Wong, Mrs Anna Walsh, Carmel Hahn, A/Prof Peter Grimison

## Corresponding author

Dr Antony J Mersiades

NHMRC Clinical Trials Centre, University of Sydney

Lifeshouse, Level 6, 119-143 Missenden Road, Camperdown, NSW, Australia, 2050

Email [antony.mersiades@gmail.com](mailto:antony.mersiades@gmail.com)

Phone +612 9562 5000

## Author affiliations

<sup>1</sup>NHMRC Clinical Trials Centre, University of Sydney, NSW, Australia

<sup>2</sup>Macarthur Cancer Therapy Centre, Campbelltown Hospital, NSW, Australia

<sup>3</sup>Discipline of Addiction Medicine, University of Sydney, NSW, Australia

<sup>4</sup>Drug Health Services, Sydney Local Health District, NSW, Australia

<sup>5</sup>Dept of Medical Oncology, Chris O'Brien Lifeshouse, NSW, Australia

<sup>6</sup>Dept of Medical Oncology, Concord Cancer Care Centre, Concord Hospital, NSW, Australia

<sup>7</sup>Drug and Alcohol Services, South East Sydney Local Health District, NSW, Australia

<sup>8</sup>Lambert Initiative for Cannabinoid Therapeutics, University of Sydney, NSW, Australia

<sup>9</sup>Sansom Institute for Health Research, University of South Australia, Australia

<sup>10</sup>Dept of Medical Oncology, Calvary Mater Newcastle, NSW, Australia

<sup>11</sup>Central West Cancer Care Centre, Orange Health Service, NSW, Australia

<sup>12</sup>Dept of Medical Oncology, Royal North Shore Hospital, NSW, Australia

<sup>13</sup>Kolling Institute of Medical Research, NSW, Australia

<sup>14</sup>Mid North Coast Cancer Institute, Coffs Harbour Hospital, NSW, Australia

<sup>15</sup>Illawarra Shoalhaven Cancer and Haematology Network, Wollongong Hospital, NSW, Australia

## Keywords

Cannabis, cannabidiol, chemotherapy-induced nausea and vomiting, randomized trial, antiemetic

**Word count - 3672**

## ABSTRACT

**Introduction** Chemotherapy-induced nausea and vomiting (CINV) remains an important issue for patients receiving chemotherapy despite guideline consistent antiemetic therapy. Trials using delta-9-Tetrahydrocannabinol-rich (THC) products demonstrate limited antiemetic effect, significant adverse events, and flawed study design. Trials using cannabinoid-rich (CBD) products demonstrate improved efficacy and psychological adverse event profile. No definitive trials have been conducted to support the use of cannabinoids for this indication, nor has the potential economic impact of incorporating such regimens into the Australian healthcare system been established. CannabisCINV aims to assess the efficacy, safety and cost-effectiveness of adding *TN-TC11M*, an oral cannabidiol-rich THC/CBD extract to guideline-consistent anti-emetics in the secondary prevention of CINV.

**Methods and analysis** The current multi-centre, 1:1 randomised cross-over, placebo-controlled pilot study will recruit 80 adult patients with any malignancy, experiencing CINV during moderate to highly emetogenic chemotherapy despite guideline consistent antiemetics. Patients receive oral *TN-TC11M* (2.5/2.5mg) capsules or placebo capsules TDS on day -1 to day 5 of cycle A of chemotherapy, followed by the alternative drug regimen during Cycle B of chemotherapy, and the preferred drug regimen during cycle C. The primary endpoint is the proportion of subjects attaining a complete response to CINV. Secondary and tertiary endpoints include regimen tolerability, impact on quality of life and health system resource use. The primary assessment tool is patient diaries, which are filled from day -1 to day 5. A subsequent randomised placebo-controlled parallel phase III trial will recruit a further 250 patients.

**Ethics and dissemination** The protocol was approved by ethics review committees for all participating sites. Results will be disseminated in peer-reviewed journals and at scientific conferences.

**Trial registration number** Pre-results, ACTRN number 12616001036404)

## Strengths and limitations of the study

- ◆ Largest and most definitive trial of cannabis for secondary prevention of CINV
- ◆ First study to assess the impact on health resource use and cost-effectiveness of cannabis within the Australian health system
- ◆ Participants and staff blinded to intervention
- ◆ Utility of patient-reported outcomes
- ◆ Self-titrating dose of THC/CBD

## INTRODUCTION

Chemotherapy-induced nausea and vomiting (CINV) remains a significant cause of morbidity in oncology patients despite the best current antiemetic prophylaxis<sup>1</sup>.

The Multinational Association of Supportive Care in Cancer (MASCC) has published guidelines which recommend a standardised regimen of a 5-HT<sub>3</sub> receptor antagonist, with dexamethasone, and for most regimens an NK-1 antagonist for optimal antiemetic prophylaxis of moderate or high emetic risk<sup>2</sup>. Even amongst patients receiving guideline-consistent antiemetic prophylaxis, contemporary observational studies of moderate or highly emetogenic chemotherapy found that 46-57% experienced significant nausea, and 9-37% experienced vomiting<sup>3-6</sup>.

## Cannabinoids for chemotherapy-induced nausea and vomiting

The mechanism of delayed nausea and vomiting is incompletely understood, but may involve non-serotonergic receptors including the cannabinoid CB<sub>1</sub> receptor, with a potential role for cannabis products in its amelioration<sup>7</sup>. There is limited evidence of the efficacy of cannabis products for the prevention and treatment of CINV<sup>8</sup>. Whilst several studies have been carried out using smoked marijuana or synthetic oral tetra-hydrocannabinol medicines (THC: *Dronabinol*, *Nabilone*) for treating CINV, most showed limited efficacy, were inadequately powered and utilized outdated control antiemetic arms<sup>9</sup>.

The major limitations of current oral THC-rich cannabinoids for this indication are unpredictable gastrointestinal absorption, poor bioavailability, delayed onset of action, and inability to rapidly self-titrate the dose for nausea control depending on tolerance<sup>9</sup>. Furthermore, THC-only medications

can be limited in their therapeutic potential by their intoxicating and disorientating central nervous system effects at the higher doses often needed to control nausea and vomiting<sup>9</sup>. CBD is known to counteract the psychiatric adverse effects of THC, and has inherent anxiolytic properties<sup>10</sup>. The addition of CBD to THC should ameliorate the intoxicating effects of THC, and allow delivery of higher therapeutic doses, without increasing the overall intoxication, paranoia and euphoria associated with THC, with diminished potential for abuse<sup>11</sup>.

Nabiximols (*Sativex*; GW Pharmaceuticals, UK) is a THC/CBD cannabis extract derived from the *Cannabis sativa* plant containing THC and CBD in defined and near-equal amounts, and presented as a buccal spray<sup>11</sup>. A published small pilot double-blind randomised trial of nabiximols for secondary prevention of CINV found substantial efficacy, high patient acceptability, and manageable side effects<sup>12</sup>. In this study, 16 patients who experienced CINV after moderately emetogenic chemotherapy, despite prophylaxis with a guideline-consistent anti-emetic regimen<sup>12</sup>, were randomised to nabiximols or placebo. Participants received up to 8.1mg THC/7.5mg CBD over 2 hours, then up to 21.6mg THC/20mg CBD every 24 hours for 5 x 24 hour periods. In the nabiximols group, the mean dose per 24 hours was 13mg THC (range 5.4-13.5)/12mg CBD (range 5-12.5) and the median duration was 3 days (range 1-5). The short dose titration was tolerated in 86% receiving nabiximols, with one patient discontinuing because of transient psychiatric effects. Adverse effects were experienced in 86% receiving nabiximols and 67% receiving placebo. Substantial efficacy was observed, with complete response in 71% vs 22%, (difference 49% (95% CI 1%, 75%)), absence of delayed emesis in 71% vs 22%, and nausea in 57% vs 22%, however no difference in acute nausea nor vomiting<sup>12</sup>. Nabiximols is licenced for the indication of neurospasticity in Multiple Sclerosis, but is not commercially available in Australia, and is not available for use in our proposed trial. There is a paucity of data on the cost-effectiveness of nabiximols outside of Multiple Sclerosis<sup>13</sup>.

This study will use a novel oral THC/CBD capsule liposomal formulation ('*TN-TC11M*', Tilray). The product is intended to provide equivalent systemic exposures to THC and CBD as nabiximols and will be dosed similarly to the Duran study, commencing 24 hours prior to chemotherapy to confirm tolerability.

## HYPOTHESIS

### Primary hypothesis

We hypothesise that the addition of *TN-TC11M* to standard guideline-based antiemetics will improve the control of CINV, leading to improved quality of life. The potential resource implications are of higher CINV regimen drug costs, but reduced costs of the management of refractory CINV through the reduced need for rescue medications and reduced hospitalisation.

## METHODS AND ANALYSIS

The Cannabis for Chemotherapy Induced Nausea and Vomiting (CannabisCINV) trial is an Australian-based, double-blind, placebo-controlled, two-stage randomised controlled trial. The primary aim is to determine the efficacy of adding an oral cannabidiol-rich THC extract (*TN-TC11M*) for secondary prevention of CINV after failure of a guideline consistent prophylactic anti-emetic regimen.

### Study objectives

The primary objective of this study is to compare, amongst patients randomised to *TN-TC11M* or placebo, the ability to control emesis and nausea, as determined by:

- ◆ The proportion of patients achieving a 'complete response' during the overall phase of treatment (0 – 120 hours), defined as no nausea, no emesis and no use of rescue medications
- The pilot study (cross-over) and definitive trial (parallel) will use different methods of analysis as outlined in the statistical analysis section.

The secondary objectives are to compare, amongst patients randomised to *TN-TC11M* or placebo:

- ◆ Efficacy

- Proportions of patients during acute (0 – 24 hours), delayed (24 – 120 hours) and overall (0 – 120 hours) phases of cycles A, B and C with (i) complete response, (ii) no emesis (vomiting or dry retching), (iii) no significant nausea, and (iv) no use of rescue medications
- Number of emetic episodes during 0 – 120 hours of cycles A, B and C
- ◆ Cannabinoid-related and other adverse events
  - Endpoint: Proportions with specified cannabinoid-related and other adverse events (structured checklist, CTCAE)
- ◆ Health-related quality of life
  - Endpoint: Summary scales (nausea, vomiting) of Functional Living Index-Emesis, and all items of AQOL-8D
- ◆ Regimen's acceptability
  - Endpoint: Adherence (patient diaries, pill counts), preference

The tertiary and correlative objectives are:

- ◆ To compare health system resource use and costs between randomised groups
  - Endpoint: Health system resource use and costs
- ◆ To model the cost-effectiveness of cannabinoid therapy compared to placebo or other anti-emesis alternatives, for prevention of CINV, from the perspective of the healthcare system
  - Endpoint: Health outcomes relative to costs

### **Trial oversight and monitoring**

The CannabisCINV trial is a collaboration between the Chris O'Brien Lifehouse; the National Health and Medical Research Council (NHMRC) Clinical Trials Centre, University of Sydney; and the Lambert Initiative for Cannabinoid Therapeutics, University of Sydney.

Safety and feasibility endpoints will be reviewed at 3-monthly intervals by the Independent Data and Safety Monitoring Committee (IDSMC) during both the pilot and phase III trial. The IDSMC will assess the rate of serious adverse events (SAEs) (graded  $\geq 3$  by CTCAE criteria) and accrual, with no pause in recruitment planned. Consideration will be given to altering aspects of the study if:

- ◆ The accrual rate is insufficient to complete the study in a reasonable timeframe
- ◆ The rate of SAEs in the oral *TN-TC11M* arm is unacceptably high compared with the placebo arm
- ◆ Medical or ethical reasons emerge affecting continued performance of the study

### **Trial design**

The protocol consists of a pilot phase II, double-blinded, randomised, placebo-controlled cross-over study followed by a planned definitive phase III, blinded, randomised, parallel, placebo-controlled trial (see figure 1). The pilot trial will be conducted at 10 sites across the state of NSW, Australia, in both tertiary referral centres and regional centres in outpatient comprehensive cancer care units. A list of the study sites can be accessed from the Australia and New Zealand Clinical Trials Registry (ANZCTR).

Figure 1

### **Inclusion criteria**

Adult patients with any malignancy receiving moderate to highly emetogenic intravenous chemotherapy (Day 1) in a 14 or 21-day cycle, who have experienced significant CINV despite guideline consistent anti-emetics. Patients must be planned for at least 2 further cycles of the same chemotherapy regimen, with an ECOG performance status of 2 or less.

### **Exclusion criteria**

1  
2  
3 Patients with the following characteristics will be excluded from study enrolment:

- 4 ♦ Symptomatic central nervous system/leptomeningeal disease, gastro-intestinal tract obstruction  
5 or disease-related nausea or vomiting requiring daily antiemetic therapy
- 6 ♦ Oral chemotherapy during study treatment (eg. oral Capecitabine)
- 7 ♦ Radiotherapy to the brain, abdomen or pelvis within the week prior to commencing study  
8 treatment, or planned during study treatment
- 9 ♦ Contra-indication to cannabinoid treatment
  - 10 ○ Unstable cardiovascular disease (uncontrolled hypertension, unstable ischaemic heart  
11 disease, unstable congestive cardiac failure)
  - 12 ○ History of epilepsy or recurrent seizures
  - 13 ○ History of schizophrenia, other psychotic illness, severe personality disorder, suicidal  
14 ideation, or other significant psychiatric disorder, other than depression associated with  
15 the underlying condition
  - 16 ○ Substance use disorder (ICD-10 criteria of abuse or dependence) to alcohol, opioids,  
17 benzodiazepines, cannabis or illicit stimulants
  - 18 ○ Unwilling/unable to avoid driving or operating heavy machinery during and for up to 72  
19 hours after taking study medication
  - 20 ○ Concerns regarding safe storage of medication
- 21 ♦ Cannabis or cannabinoid-based medications within 30 days of study or unwilling to abstain for  
22 the duration of the study
- 23 ♦ Prior hypersensitivity or intolerable adverse reaction to cannabis or cannabinoid-based  
24 medications, 5HT<sub>3</sub> antagonist, dexamethasone or NK<sub>1</sub> antagonist
- 25 ♦ Pregnancy, lactation, or inadequate contraception. Women must be post-menopausal, infertile,  
26 or use a reliable means of contraception. Women of childbearing potential must have a negative  
27 pregnancy test done within 7 days prior to registration. Men must have been surgically sterilised  
28 or use a (double if required) barrier method of contraception.
- 29
- 30

### 31 **Investigational medical product**

#### 32 *TN-TC11M*

33 This study will use a novel oral THC/CBD capsule liposomal formulation ('*TN-TC11M*', Tilray) derived  
34 from *Cannabis Sativa L.* extract. It contains Delta-9-Tetrahydrocannabinol (THC) and Cannabidiol  
35 (CBD) in a 1:1 ratio, with each oral capsule containing 2.5mg THC and 2.5mg CBD. This is intended to  
36 provide equivalent systemic exposures to THC and CBD as those obtained from nabiximols (a single  
37 dose of nabiximols which comprises 2.7mg THC and 2.5mg CBD) and will be dosed similarly to the  
38 Duran study<sup>12</sup>. Investigational product administration will commence 24 hours prior to  
39 chemotherapy to confirm tolerability.  
40

### 41 **Placebo**

42 The placebo will be in white capsules, identical in appearance to that of the active treatment.  
43

### 44 **Double-blind conditions**

45 Pharmaceutical Packaging Professionals (PPP) will store and distribute the drug on behalf of the  
46 study sponsor to all participating sites upon receipt of all drug order forms.  
47

### 48 **Background treatment**

49 All patients will receive antiemetics including 5HT<sub>3</sub> antagonist, corticosteroid, and (where indicated)  
50 NK<sub>1</sub> antagonist; according to a pre-specified choice of regimen consistent with guidelines from eviQ  
51 Cancer Treatments Online<sup>14</sup> and/or MASCC guidelines for optimal anti-emetic prophylaxis of  
52 chemotherapy<sup>2</sup>.  
53

54 The following rescue therapies are permitted:

- 55 ♦ Lorazepam, eg 1mg PO bd prn
- 56
- 57
- 58
- 59



- ◆ Metoclopramide, eg 10mg PO tds prn
- ◆ Haloperidol, eg 0.5 – 1mg PO tds prn
- ◆ Prochlorperazine, eg 5 – 10mg PO tds prn, 25mg sup PR q8h prn
- ◆ Olanzapine, eg 5mg PO bd or 10mg PO mane for 3 days

Note:

- ◆ 5HT3 antagonists should only be used when other rescue therapies have failed

### Recruitment and consent

Patient screening and enrolment undertaken at participating sites will be overseen by the site principal investigator and performed by trained study personnel. A screening log will document all eligible patients screened and approached along with reasons for any exclusions. Patients will provide written informed consent prior to study enrolment.

### Pilot study

The phase II pilot trial (N=80) will be a multi-site, 1:1 randomised, double-blind, placebo-controlled trial (Figure 1). The dosing regimen will be similar to that used in the nabiximiols study by *Duran et al* described above, which was shown to be well tolerated and effective, however patients will also receive study drug for 24 hours prior to chemotherapy to confirm tolerability. It will utilise a crossover design and a significance level of 10% to increase efficiency, and allow patients to nominate a preferred drug in the final cycle.

In the pilot study, during chemotherapy cycle A, subjects will be randomised to receive oral *TN-TC11M* capsules (2.5/2.5mg) TDS from day -1 to 5, or identical placebo capsules, in addition to guideline consistent anti-emetics. For cycle B, subjects will cross-over to receive the alternative formulation in the same schedule.

On treatment, patients will be able to self-titrate their *TN-TC11M* /placebo exposure based on tolerance, with a maximum does of 30mg/30mg per day (12 tablets) (Table 1). Following cycle B, subjects are asked to nominate their preferred regimen after cycle B, and where relevant will receive that agent with cycle C.

**Table 1: On treatment schedule with dose modifications**

| Day | Time                                                              | Dose         | Dose titration                                                                                                                                | Maximum dose per 24-hour period               |
|-----|-------------------------------------------------------------------|--------------|-----------------------------------------------------------------------------------------------------------------------------------------------|-----------------------------------------------|
| -1  | Mane                                                              | 1 capsule    | N/A                                                                                                                                           | 5 capsules<br>12.5mg<br>TCH/CBD or<br>placebo |
|     | Midi<br>(at least 4 hours after<br>previous dose)                 | 2 capsules   | Miss dose if intoxicated                                                                                                                      |                                               |
|     | Nocte<br>(at least 4 hours after<br>previous dose)                | 1–2 capsules | Miss dose if intoxicated<br><br>Reduce dose by 1 capsule if<br>previous dose not tolerated<br><br>Maintain dose if previous dose<br>tolerated |                                               |
| 1   | 60 min prior to<br>chemotherapy                                   | 1–2 capsules | Miss dose if intoxicated                                                                                                                      | 8 capsules<br>20mg TCH/CBD<br>or placebo      |
|     | Immediately after<br>completion of Day 1<br>chemotherapy infusion | 1–3 capsules | Reduce dose by 1 capsule if<br>previous dose not tolerated<br><br>Maintain dose if previous dose<br>tolerated, with nausea control            |                                               |
|     | 4 hours after<br>completion of Day 1                              | 1–3 capsules | Increase dose by 1 capsule if<br>previous dose tolerated, but                                                                                 |                                               |

|   | chemotherapy infusion                 |              | inadequate nausea control                                                                  |                                           |
|---|---------------------------------------|--------------|--------------------------------------------------------------------------------------------|-------------------------------------------|
| 2 | Continue tds<br>Mane<br>Midi<br>Nocte | 1–4 capsules | Miss dose if intoxicated                                                                   | 12 capsules<br>30mg TCH/CBD<br>or placebo |
| 3 |                                       |              | Reduce dose by 1 capsule if<br>previous dose not tolerated                                 |                                           |
| 4 |                                       |              | Maintain dose if previous dose<br>tolerated, with nausea control                           |                                           |
| 5 | Mane                                  | 1–4 capsules | Increase dose by 1 capsule if<br>previous dose tolerated, but<br>inadequate nausea control | 8 capsules<br>20mg TCH/CBD<br>or placebo  |
|   | Take final dose Midi<br>Day 5         |              |                                                                                            |                                           |

Table 1 shows the starting dose will be 1 capsule PO on the morning of Day -1, with the next scheduled dose of 2 capsules (if tolerated, at midday), followed by 2 capsules that evening (if tolerated). On Day 1 subjects receive 1–2 capsules 60 minutes prior to chemotherapy infusion, followed by 1–3 capsules immediately after completion of Day 1 infusional chemotherapy, then 1–3 capsules 4 hours after completion of Day 1 infusional chemotherapy. On Days 2–5 subjects take 1–4 tablets TDS, with instruction to dose-titrate according to intoxication, tolerance of prior dose, and nausea control. The final dose is at midday on Day 5, with no further treatment until Day -1 of the next chemotherapy cycle.

### Definitive study

The definitive randomised phase 3 study (N=250) will have a parallel group design, to reduce bias given the possibility of carry-over effect from cross-over in subsequent cycles, and to investigate longer-term efficacy over multiple chemotherapy cycles.

In the definitive study, during cycle A, subjects will receive oral *TN-TC11M* capsules (2.5/2.5mg) TDS from day -1 to 5, or identical placebo capsules, in the same treatment schedule (see table 1). For cycle B (and C if relevant), subjects will re-commence treatment with the investigational product on their maximum tolerated dose from the previous cycle, with further scope to self-titrate according to symptoms.

### Data acquisition

The participant will be instructed on the use of the patient diary, which has been designed for this study, to record;

- ◆ Nausea (past 24-hour period)
- ◆ Date, time and type of rescue medication used
- ◆ Vomiting and dry retching episodes

The patient diary will be completed by the patient. There will be daily assessment of patients on days 1 to 6 of each cycle to ensure:

- ◆ Study treatments are taken appropriately
- ◆ Accurate records in the patient diary
- ◆ Completion of structured checklist of cannabinoid-specific adverse events
- ◆ Advice is provided regarding management of any adverse events

### STATISTICAL CONSIDERATIONS

#### Sample size estimation

The estimated sample size for the pilot trial is 80 patients (40 per arm), using a primary endpoint of complete response to the study drug and placebo during cycle A and B of treatment. Utilizing a cross-over design, randomising patients to either study drug followed by placebo or placebo followed by study drug, will have 80% power at a 2-sided significance level of 10% to detect a 20% difference in discordant responses (response on one intervention, but not the other). Accrual is expected to take 12 months. The 20% difference is based on the assumption that 42% of patients on

1  
2  
3 the study drug will respond compared with 22% on placebo, and that the responders in the placebo  
4 group will respond/not respond equally on the study drug (11% respond on each).

5 The estimated sample size for the definitive trial is 250 patients (125 per arm), using a primary  
6 endpoint of complete response during cycle A of study treatment. A sample size of 250 patients  
7 provides 80% power at 2-sided 5% level of significance to detect improvement in complete response  
8 from 22% to 42.5%. Accrual is expected to take 2.5 years.

9 The sample size for each trial will allow for a drop-out/ineligibility rate of 20%.

10 The current evidence suggests that this level of improvement is both worthwhile and feasible.

## 11 12 **Statistical analysis**

### 13 **Pilot study**

14 Analyses will be conducted using intention to treat (ITT) principles. The primary analyses will include  
15 all patients who were randomised. Missing values will not be imputed. The results will be examined  
16 for differential effect in the two periods and if necessary, the data from cycle A will be analysed  
17 separately.

18 The primary outcome is complete response. The primary analysis will be a comparison of the  
19 proportion of patients with a complete response between the two treatments over cycle A and cycle  
20 B, using McNemar's test. In the event that there is differential drop-out between period, or a period  
21 by treatment interaction, the results from the first period will be analysed using a chi-square test.  
22 Analyses to assess period by treatment interaction will use Generalised Estimating Equations (GEEs)  
23 to account for the correlation within a patient. Secondary analyses to adjust for any baseline  
24 variables will also use GEEs. All tests will use a two-sided significance level of 10%.

### 25 26 27 **Definitive study**

28 The primary analyses will include all randomised patients using ITT principles, and compare the  
29 proportion of patients with complete response in the two treatment arms during the overall phase  
30 (0-120 hours) of cycle A, using a Chi-square test. Secondary analyses adjusting for baseline variables  
31 will use GEEs. Binary secondary outcomes will be analysed as for the primary outcome. Count data  
32 will be analysed using a Generalised Linear Model with a Poisson distribution. Cannabinoid-related  
33 adverse events and measures of adherence will be analysed with a chi-square test or two-sample t-  
34 test or just listed depending on numbers. All tests will use a two-sided significance level of 5%.

### 35 36 37 **Health economic analysis**

38 A within-trial and modelled economic evaluation will be undertaken to determine the incremental  
39 cost-effectiveness of oral cannabinoid therapy compared to placebo and other anti-emetic  
40 therapies, from a health system perspective.

41 For the within-trial analysis, resource use will be identified and measured from trial case report  
42 forms (for hospitalisations), and through linkage to Medicare claims data for outpatient visits (MBS)  
43 and prescribed medicines (PBS). Australian unit costs will be applied to the resource usage data (e.g.  
44 Australian Refined Diagnostic Related Groups (AR-DRG), and Medicare scheduled fees using the  
45 most recent reference year). For the modelled evaluation, resource use will be taken from the trial  
46 data for cannabinoid and placebo therapies, and supplemented with published estimates of  
47 resource use and costs for alternative 'usual care' anti-emetic therapies.

48 Health outcomes will include the proportion of complete responders (i.e. participants with no  
49 emesis and no use of rescue medications); quality of life as measured by the FLIE with 5-day recall  
50 and AQOL-8D instruments<sup>15</sup>, and quality-adjusted survival. Quality-adjusted survival time will be  
51 used to quantify the incremental effectiveness of cannabinoid treatment. Quality-adjusted survival  
52 will be calculated by applying utility weights for quality of life derived from the AQOL-8D utility  
53 instrument to survival data using established methods.

Two cost-effectiveness outcomes will be reported: 1) the incremental cost per additional complete responder (trial primary endpoint) at 30 days after last dose of study drug, and 2) the incremental cost per quality-adjusted life year (QALY) gained at 12 months, using extrapolated data. These will be expressed as incremental cost-effectiveness ratios and plotted on a cost-effectiveness plane. Bootstrapping will be used to estimate a distribution around costs and health outcomes, and to calculate confidence intervals around incremental cost-effectiveness ratios<sup>16</sup>. A cost-effectiveness acceptability curve (CEAC) will be plotted, providing information about the probability that the intervention is cost-effective given the Australian Government's willingness to pay for a QALY gained<sup>17</sup>. One-way, two-way and probabilistic sensitivity analyses will be undertaken for relevant variables, including cost of the study drug.

## ETHICS AND DISSEMINATION

### Approval and patient-informed consent

In Australia, the study will be conducted according to the Note for Guidance on Good Clinical Practice (CPMP/ICH/135/95) annotated with TGA comments (Therapeutic Goods Administration DSEB July 2000) and in compliance with applicable laws and regulations. The study will be performed in accordance with the NHMRC Statement on Ethical Conduct in Research Involving Humans 2007 – updated May 2015, the NHMRC Australian Code for the Responsible Conduct of Research 2007, and the principles laid down by the World Medical Assembly in the Declaration of Helsinki 2008.

To this end, no patient will be recruited to the study until all the necessary approvals have been obtained and the patient has provided written informed consent. Further, the investigator shall comply with the protocol, except when a protocol deviation is required to eliminate immediate hazard to a participant. In this circumstance the NHMRC CTC, principal investigator and HREC must be advised immediately.

### TRIAL STATUS

Patient enrolment for the pilot study commenced in November 2016 at the Chris O'Brien Lifehouse in NSW, Australia, with the 10<sup>th</sup> NSW site opened in June 2017. To date 31 patients have been enrolled, with anticipated pilot study enrolment completion by April 2018.

**Acknowledgements** Special study personnel, patients and their families

**Contributors** PG, PSH, MS, NL, JS, IM, IO, DJA, CG, AK, were responsible for study concept (grant authors) and protocol development, RLM was responsible for protocol development. PG, AT, AM, NW, AW, CH, AK, MS, CG, PF, SC, KB and MA were responsible for study conduct.

**Funding** NSW Department of Health, drug supply by Tilray

**Drug supply** Tilray

**Competing Interests** No authors disclosed a relevant conflict of interest

**Ethics approval** Sydney Local Health District ethics review committee (Royal Prince Alfred Hospital zone). The results will be disseminated in peer-reviewed journals and at scientific conferences

**Provenance and peer review** Not commissioned; externally peer reviewed

**Data sharing statement** This is a protocol paper, and no analysed results are available at this time

**Open access** This is an open access article distributed in accordance with the Creative Commons Attribution Non-Commercial (CC BY-NC 4.0) license, which permits others to distribute, remix, adapt, build upon this work non-commercially, and license their derivative works on different terms, provided the original work is properly cited and the use is non-commercial. See <http://creativecommons.org/licenses/by-nc/4.0/>

## REFERENCES

1. Navari RM, Aapro M. Antiemetic prophylaxis for chemotherapy-induced nausea and vomiting. *New England Journal of Medicine* 2016;374(14):1356-67.

- 1  
2  
3 2. Multinational Association of Supportive Care in Cancer. MASCC/ESMO Antiemetic guideline  
4 2016 [Available from: <http://www.mascc.org/antiemetic-guidelines> accessed 21 Aug 2017.  
5
- 6 3. Roila F, Herrstedt J, Aapro M, et al. Guideline update for MASCC and ESMO in the prevention  
7 of chemotherapy-and radiotherapy-induced nausea and vomiting: results of the Perugia  
8 consensus conference. *Annals of Oncology* 2010;21(suppl\_5):v232-v43.  
9
- 10 4. Gilmore JW, Peacock NW, Gu A, et al. Antiemetic guideline consistency and incidence of  
11 chemotherapy-induced nausea and vomiting in US community oncology practice: INSPIRE  
12 Study. *Journal of Oncology Practice* 2013;10(1):68-74.  
13
- 14 5. Molassiotis A, Saunders MP, Valle J, et al. A prospective observational study of chemotherapy-  
15 related nausea and vomiting in routine practice in a UK cancer centre. *Supportive Care in Cancer*  
16 2008;16(2):201-08.  
17
- 18 6. Aapro M, Molassiotis A, Dicato M, et al. The effect of guideline-consistent antiemetic therapy  
19 on chemotherapy-induced nausea and vomiting (CINV): the Pan European Emesis Registry  
20 (PEER). *Annals of Oncology* 2012;23(8):1986-92.  
21
- 22 7. Frame D. Best practice management of CINV in oncology patients: I. Physiology and treatment  
23 of CINV. Multiple neurotransmitters and receptors and the need for combination therapeutic  
24 approaches. *The journal of supportive oncology* 2010;8(2 Suppl 1):5-9.  
25
- 26 8. Penington DG. Medical cannabis: time for clear thinking. *Medical Journal of Australia*  
27 2015;202(2):74-76.  
28
- 29 9. Kramer JL. Medical marijuana for cancer. *CA: a cancer journal for clinicians* 2015;65(2):109-  
30 22.  
31
- 32 10. Bhattacharyya S, Morrison PD, Fusar-Poli P, et al. Opposite effects of  $\Delta$ -9-  
33 tetrahydrocannabinol and cannabidiol on human brain function and psychopathology.  
34 *Neuropsychopharmacology* 2010;35(3):764.  
35
- 36 11. Allsop DJ, Copeland J, Lintzeris N, et al. Nabiximols as an agonist replacement therapy during  
37 cannabis withdrawal: a randomized clinical trial. *JAMA psychiatry* 2014;71(3):281-91.  
38
- 39 12. Duran M, Pérez E, Abanades S, et al. Preliminary efficacy and safety of an oromucosal  
40 standardized cannabis extract in chemotherapy-induced nausea and vomiting. *British journal of*  
41 *clinical pharmacology* 2010;70(5):656-63.  
42
- 43 13. Herzog S, Shanahan M, Grimison P, et al. Systematic Review of the Costs and Benefits of  
44 Prescribed Cannabis-Based Medicines for the Management of Chronic Illness: Lessons from  
45 Multiple Sclerosis. *PharmacoEconomics* 2017 doi: 10.1007/s40273-017-0565-6  
46
- 47 14. Cancer Institute of New South Wales. Prevention of chemotherapy induced nausea and  
48 vomiting 2017 [updated 30 Aug 2017. Available from: [https://www.eviq.org.au/clinical-  
49 resources/side-effect-and-toxicity-management/gastrointestinal/7-prevention-of-  
50 chemotherapy-induced-nausea-and-vo](https://www.eviq.org.au/clinical-resources/side-effect-and-toxicity-management/gastrointestinal/7-prevention-of-chemotherapy-induced-nausea-and-vo) accessed 30 Oct 2017.  
51
- 52 15. Richardson J, Iezzi A, Khan MA, et al. Validity and reliability of the Assessment of Quality of  
53 Life (AQoL)-8D multi-attribute utility instrument. *The Patient-Patient-Centered Outcomes*  
54 *Research* 2014;7(1):85-96.  
55  
56  
57  
58  
59

1  
2  
3 16. Campbell M, Torgerson D. Bootstrapping: estimating confidence intervals for cost-  
4 effectiveness ratios. *Qjm* 1999;92(3):177-82.

5  
6 17. Fenwick E, O'Brien BJ, Briggs A. Cost-effectiveness acceptability curves—facts, fallacies and  
7 frequently asked questions. *Health economics* 2004;13(5):405-15.

8  
9  
10  
11  
12  
13  
14  
15  
16  
17  
18  
19  
20  
21  
22  
23  
24  
25  
26  
27  
28  
29  
30  
31  
32  
33  
34  
35  
36  
37  
38  
39  
40  
41  
42  
43  
44  
45  
46  
47  
48  
49  
50  
51  
52  
53  
54  
55  
56  
57  
58  
59  
60

For peer review only

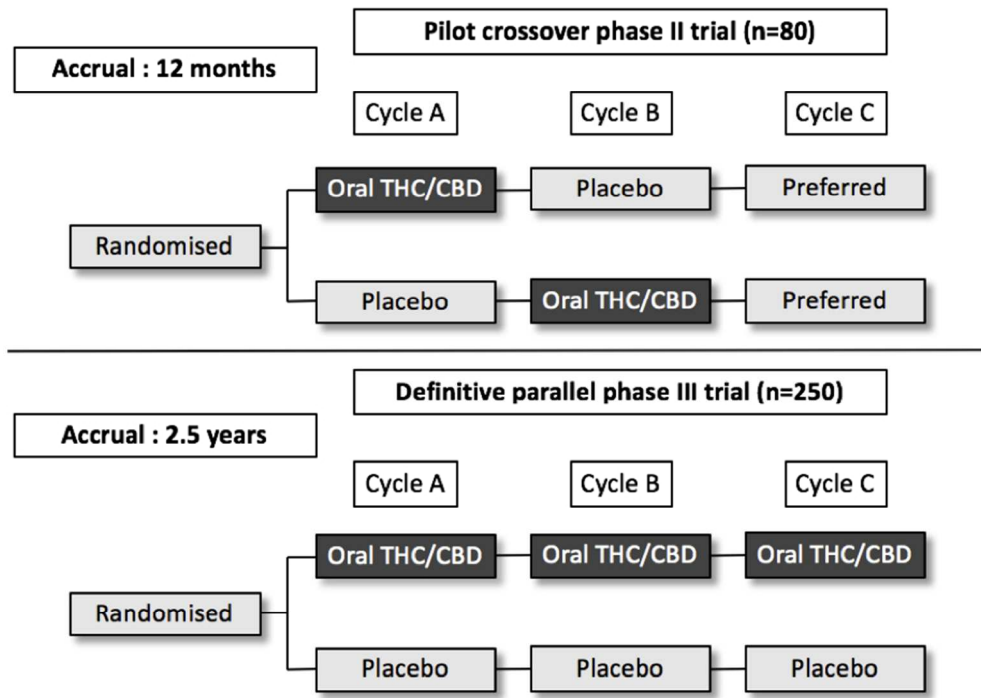

Figure 1 - Study schema

157x115mm (150 x 150 DPI)

Preprint only

# BMJ Open

## Oral cannabinoid-rich THC/CBD cannabis extract for secondary prevention of chemotherapy-induced nausea and vomiting: a study protocol for a pilot and definitive randomised double-blind placebo-controlled trial (CannabisCINV)

|                                 |                                                                                                                                                                                                                                                                                                                                                                                                                                                                                                                                                                                                                                                                                                                                                                                                                                                                                                                                                                                                                                                                                                                                                                                                                                                                                                                                                                                                                                                                                                                                                                                                                                                                                                                                                                                                                                                                                                                                                                                                                                                                                                                                                |
|---------------------------------|------------------------------------------------------------------------------------------------------------------------------------------------------------------------------------------------------------------------------------------------------------------------------------------------------------------------------------------------------------------------------------------------------------------------------------------------------------------------------------------------------------------------------------------------------------------------------------------------------------------------------------------------------------------------------------------------------------------------------------------------------------------------------------------------------------------------------------------------------------------------------------------------------------------------------------------------------------------------------------------------------------------------------------------------------------------------------------------------------------------------------------------------------------------------------------------------------------------------------------------------------------------------------------------------------------------------------------------------------------------------------------------------------------------------------------------------------------------------------------------------------------------------------------------------------------------------------------------------------------------------------------------------------------------------------------------------------------------------------------------------------------------------------------------------------------------------------------------------------------------------------------------------------------------------------------------------------------------------------------------------------------------------------------------------------------------------------------------------------------------------------------------------|
| Journal:                        | <i>BMJ Open</i>                                                                                                                                                                                                                                                                                                                                                                                                                                                                                                                                                                                                                                                                                                                                                                                                                                                                                                                                                                                                                                                                                                                                                                                                                                                                                                                                                                                                                                                                                                                                                                                                                                                                                                                                                                                                                                                                                                                                                                                                                                                                                                                                |
| Manuscript ID                   | bmjopen-2017-020745.R1                                                                                                                                                                                                                                                                                                                                                                                                                                                                                                                                                                                                                                                                                                                                                                                                                                                                                                                                                                                                                                                                                                                                                                                                                                                                                                                                                                                                                                                                                                                                                                                                                                                                                                                                                                                                                                                                                                                                                                                                                                                                                                                         |
| Article Type:                   | Protocol                                                                                                                                                                                                                                                                                                                                                                                                                                                                                                                                                                                                                                                                                                                                                                                                                                                                                                                                                                                                                                                                                                                                                                                                                                                                                                                                                                                                                                                                                                                                                                                                                                                                                                                                                                                                                                                                                                                                                                                                                                                                                                                                       |
| Date Submitted by the Author:   | 12-Apr-2018                                                                                                                                                                                                                                                                                                                                                                                                                                                                                                                                                                                                                                                                                                                                                                                                                                                                                                                                                                                                                                                                                                                                                                                                                                                                                                                                                                                                                                                                                                                                                                                                                                                                                                                                                                                                                                                                                                                                                                                                                                                                                                                                    |
| Complete List of Authors:       | <p>Mersiades, Antony; University of Sydney, NHMRC Clinical Trials Centre<br/> Tognela, Annette; South Western Sydney Local Health District, Macarthur Cancer Therapy Centre, Campbelltown Hospital<br/> Haber, Paul; University of Sydney - Camperdown and Darlington Campus, Discipline of Addiction medicine; Sydney Local Health District, Drug Health Services<br/> Stockler, Martin; University of Sydney , NHMRC Clinical Trials Centre; Sydney Local Health District, Dept of Medical Oncology, Concord Cancer Care Centre<br/> Lintzeris, Nicholas; South East Sydney Local Health District, The Langton Centre; University of Sydney - Camperdown and Darlington Campus, Discipline of Addiction Medicine<br/> Simes, John; University of Sydney, NHMRC Clinical Trials Centre; Chris O'Brien Lifehouse, Dept of Medical Oncology<br/> McGregor, Iain; University of Sydney, Lambert Initiative for Cannabinoid Therapeutics<br/> Olver, Ian; University of South Australia, Sansom Institute for Health Research<br/> Allsop, David; University of Sydney, Lambert Initiative for Cannabinoid Therapeutics<br/> Gedye, Craig; Calvary Mater Newcastle, Dept of Medical Oncology<br/> Kirby, Adrienne; University of Sydney, NHMRC Clinical Trials Centre<br/> Morton, Rachael; The University of Sydney, NHMRC Clinical Trials Centre<br/> Fox, Peter; Orange Health Service, Central West Cancer Care Centre<br/> Clarke, Stephen; North Sydney Local Health District, Dept of Medical Oncology, Royal North Shore Hospital; Kolling Institute of Medical Research<br/> Briscoe, Karen; Mid North Coast Local Health District, Mid North Coast Cancer Institute<br/> Aghmesheh, Morteza; Illawarra Shoalhaven Local Health District, Illawarra Shoalhaven Cancer and Haematology Network, Wollongong Hospital<br/> Wong, Nicole; University of Sydney, NHMRC Clinical Trials Centre<br/> Walsh, Anna; University of Sydney, NHMRC Clinical Trials Centre<br/> Hahn, Carmel; Chris O'Brien Lifehouse<br/> Grimison, Peter; University of Sydney, NHMRC Clinical Trials Centre; Chris O'Brien Lifehouse, Dept of Medical Oncology</p> |
| <b>Primary Subject Heading</b>: | Oncology                                                                                                                                                                                                                                                                                                                                                                                                                                                                                                                                                                                                                                                                                                                                                                                                                                                                                                                                                                                                                                                                                                                                                                                                                                                                                                                                                                                                                                                                                                                                                                                                                                                                                                                                                                                                                                                                                                                                                                                                                                                                                                                                       |



1  
2  
3  
4  
5  
6  
7  
8  
9  
10  
11  
12  
13  
14  
15  
16  
17  
18  
19  
20  
21  
22  
23  
24  
25  
26  
27  
28  
29  
30  
31  
32  
33  
34  
35  
36  
37  
38  
39  
40  
41  
42  
43  
44  
45  
46  
47  
48  
49  
50  
51  
52  
53  
54  
55  
56  
57  
58  
59  
60

|                            |                                                                                                          |
|----------------------------|----------------------------------------------------------------------------------------------------------|
| Secondary Subject Heading: | Palliative care                                                                                          |
| Keywords:                  | Cannabis, Cannabidiol, Chemotherapy-induced nausea and vomiting, Randomized trial, Antiemetic, Marijuana |
|                            |                                                                                                          |

SCHOLARONE™  
Manuscripts

For peer review only

# Oral cannabinoid-rich THC/CBD cannabis extract for secondary prevention of chemotherapy-induced nausea and vomiting: a study protocol for a pilot and definitive randomised double-blind placebo-controlled trial (CannabisCINV)

Antony Mersiades<sup>1</sup>, Annette Tognela<sup>2</sup>, Paul S Haber<sup>3,4</sup>, Martin Stockler<sup>1,5,6</sup>, Nicholas Lintzeris<sup>3,7</sup>, John Simes<sup>1,5</sup>, Iain McGregor<sup>8</sup>, Ian Olver<sup>9</sup>, David J Allsop<sup>8</sup>, Craig Gedye<sup>10</sup>, Adrienne Kirby<sup>1</sup>, Rachael L Morton<sup>1</sup>, Peter Fox<sup>11</sup>, Stephen Clarke<sup>12,13</sup>, Karen Briscoe<sup>14</sup>, Morteza Aghmesheh<sup>15</sup>, Nicole Wong<sup>1</sup>, Anna Walsh<sup>1</sup>, Carmel Hahn<sup>5</sup>, Peter Grimison<sup>1,5</sup>

**Author** Dr Antony J Mersiades

**Co-authors** Dr Annette Tognela, Prof Paul S Haber, Prof Martin Stockler, Prof Nicholas Lintzeris, Prof John Simes, Prof Iain McGregor, Prof Ian Olver, Dr David J Allsop, Prof Craig Gedye, Ms Adrienne Kirby, Dr Rachael L Morton, Dr Peter Fox, Prof Stephen Clarke, Dr Karen Briscoe, Dr Morteza Aghmesheh, Ms Nicole Wong, Mrs Anna Walsh, Carmel Hahn, A/Prof Peter Grimison

**Trial sponsor** University of Sydney

## Corresponding author

Dr Antony J Mersiades

NHMRC Clinical Trials Centre, University of Sydney

Lifeshouse, Level 6, 119-143 Missenden Road, Camperdown, NSW, Australia, 2050

Email [antony.mersiades@gmail.com](mailto:antony.mersiades@gmail.com)

Phone +612 9562 5000

## Author affiliations

<sup>1</sup>NHMRC Clinical Trials Centre, University of Sydney, NSW, Australia

<sup>2</sup>Macarthur Cancer Therapy Centre, Campbelltown Hospital, NSW, Australia

<sup>3</sup>Discipline of Addiction Medicine, University of Sydney, NSW, Australia

<sup>4</sup>Drug Health Services, Sydney Local Health District, NSW, Australia

<sup>5</sup>Dept of Medical Oncology, Chris O'Brien Lifeshouse, NSW, Australia

<sup>6</sup>Dept of Medical Oncology, Concord Cancer Care Centre, Concord Hospital, NSW, Australia

<sup>7</sup>Drug and Alcohol Services, South East Sydney Local Health District, NSW, Australia

<sup>8</sup>Lambert Initiative for Cannabinoid Therapeutics, University of Sydney, NSW, Australia

<sup>9</sup>Sansom Institute for Health Research, University of South Australia, Australia

<sup>10</sup>Dept of Medical Oncology, Calvary Mater Newcastle, NSW, Australia

<sup>11</sup>Central West Cancer Care Centre, Orange Health Service, NSW, Australia

<sup>12</sup>Dept of Medical Oncology, Royal North Shore Hospital, NSW, Australia

<sup>13</sup>Kolling Institute of Medical Research, NSW, Australia

<sup>14</sup>Mid North Coast Cancer Institute, Coffs Harbour Hospital, NSW, Australia

<sup>15</sup>Illawarra Shoalhaven Cancer and Haematology Network, Wollongong Hospital, NSW, Australia

## Keywords

Cannabis, cannabidiol, chemotherapy-induced nausea and vomiting, randomized trial, antiemetic

**Word count – Abstract - 273, Body - 3775**

## ABSTRACT

**Introduction** Chemotherapy-induced nausea and vomiting (CINV) remains an important issue for patients receiving chemotherapy despite guideline consistent antiemetic therapy. Trials using delta-9-Tetrahydrocannabinol-rich (THC) products demonstrate limited antiemetic effect, significant adverse events, and flawed study design. Trials using cannabinoid-rich (CBD) products demonstrate improved efficacy and psychological adverse event profile. No definitive trials have been conducted to support the use of cannabinoids for this indication, nor has the potential economic impact of incorporating such regimens into the Australian healthcare system been established. CannabisCINV aims to assess the efficacy, safety and cost-effectiveness of adding *TN-TC11M*, an oral cannabidiol-rich THC/CBD extract to guideline-consistent anti-emetics in the secondary prevention of CINV.

**Methods and analysis** The current multi-centre, 1:1 randomised cross-over, placebo-controlled pilot study will recruit 80 adult patients with any malignancy, experiencing CINV during moderate to highly emetogenic chemotherapy despite guideline consistent antiemetics. Patients receive oral *TN-TC11M* (2.5/2.5mg) capsules or placebo capsules TDS on day -1 to day 5 of cycle A of chemotherapy, followed by the alternative drug regimen during Cycle B of chemotherapy, and the preferred drug regimen during cycle C. The primary endpoint is the proportion of subjects attaining a complete response to CINV. Secondary and tertiary endpoints include regimen tolerability, impact on quality of life and health system resource use. The primary assessment tool is patient diaries, which are filled from day -1 to day 5. A subsequent randomised placebo-controlled parallel phase III trial will recruit a further 250 patients.

**Ethics and dissemination** The protocol was approved by ethics review committees for all participating sites. Results will be disseminated in peer-reviewed journals and at scientific conferences.

**Trial registration number** Pre-results, ACTRN number 12616001036404

## Strengths and limitations of the study

### Strengths

- ◆ Largest and most definitive randomised double-blind placebo-controlled trial of cannabis for secondary prevention of CINV
- ◆ First study to assess the impact on health resource use and cost-effectiveness of cannabis within the Australian health system
- ◆ Utility of patient-reported outcomes
- ◆ Self-titrating dose of THC/CBD

### Limitations

- ◆ Primary outcome measure (complete response) does not include nausea assessment, to ensure comparability with other CINV trials

## INTRODUCTION

Chemotherapy-induced nausea and vomiting (CINV) remains a significant cause of morbidity in oncology patients despite the best current antiemetic prophylaxis<sup>1</sup>.

The Multinational Association of Supportive Care in Cancer (MASCC) has published guidelines which recommend a standardised regimen of a 5-HT<sub>3</sub> receptor antagonist, with dexamethasone, and for most regimens an NK-1 antagonist for optimal antiemetic prophylaxis of moderate or high emetic risk<sup>2</sup>. Even amongst patients receiving guideline-consistent antiemetic prophylaxis, contemporary observational studies of moderate or highly emetogenic chemotherapy found that 46-57% experienced significant nausea, and 9-37% experienced vomiting<sup>3-6</sup>.

## Cannabinoids for chemotherapy-induced nausea and vomiting

The mechanism of delayed nausea and vomiting is incompletely understood, but may involve non-serotonergic receptors including the cannabinoid CB<sub>1</sub> receptor, with a potential role for cannabis products in its amelioration<sup>7</sup>. There is limited evidence of the efficacy of cannabis products for the prevention and treatment of CINV<sup>8</sup>. Whilst several studies have been carried out using smoked marijuana or synthetic oral tetra-hydrocannabinol medicines (THC: *Dronabinol*, *Nabilone*) for treating CINV, most showed limited efficacy, were inadequately powered and utilized outdated control antiemetic arms<sup>9</sup>.

1  
2  
3 The major limitations of current oral THC-rich cannabinoids for this indication are unpredictable  
4 gastrointestinal absorption, poor bioavailability, delayed onset of action, and inability to rapidly self-  
5 titrate the dose for nausea control depending on tolerance<sup>9</sup>. Furthermore, THC-only medications  
6 can be limited in their therapeutic potential by their intoxicating and disorientating central nervous  
7 system effects at the higher doses often needed to control nausea and vomiting<sup>9</sup>. CBD is known to  
8 counteract the psychiatric adverse effects of THC, and has inherent anxiolytic properties<sup>10</sup>. The  
9 addition of CBD to THC should ameliorate the intoxicating effects of THC, and allow delivery of  
10 higher therapeutic doses, without increasing the overall intoxication, paranoia and euphoria  
11 associated with THC, with diminished potential for abuse<sup>11</sup>.

12 Nabiximols (*Sativex*; GW Pharmaceuticals, UK) is a THC/CBD cannabis extract derived from the  
13 *Cannabis sativa* plant containing THC and CBD in defined and near-equal amounts, and presented as  
14 a buccal spray<sup>11</sup>. A published small pilot double-blind randomised trial of nabiximols for secondary  
15 prevention of CINV found substantial efficacy, high patient acceptability, and manageable side  
16 effects<sup>12</sup>. In this study, 16 patients who experienced CINV after moderately emetogenic  
17 chemotherapy, despite prophylaxis with a guideline-consistent anti-emetic regimen<sup>12</sup>, were  
18 randomised to nabiximols or placebo. Participants received up to 8.1mg THC/7.5mg CBD over 2  
19 hours, then up to 21.6mg THC/20mg CBD every 24 hours for 5 x 24 hour periods. In the nabiximols  
20 group, the mean dose per 24 hours was 13mg THC (range 5.4-13.5)/12mg CBD (range 5-12.5) and  
21 the median duration was 3 days (range 1-5). The short dose titration was tolerated in 86% receiving  
22 nabiximols, with one patient discontinuing because of transient psychiatric effects. Adverse effects  
23 were experienced in 86% receiving nabiximols and 67% receiving placebo. Substantial efficacy was  
24 observed, with complete response in 71% vs 22%, (difference 49% (95% CI 1%, 75%)), absence of  
25 delayed emesis in 71% vs 22%, and nausea in 57% vs 22%, however no difference in acute nausea  
26 nor vomiting<sup>12</sup>. Nabiximols is licenced for the indication of neurospasticity in Multiple Sclerosis, but  
27 is not commercially available in Australia, and is not available for use in our proposed trial. There is a  
28 paucity of data on the cost-effectiveness of nabiximols outside of Multiple Sclerosis<sup>13</sup>.  
29 This study will use a novel oral THC/CBD capsule formulation ('*TN-TC11M*', Tilray). The product is  
30 intended to provide equivalent systemic exposures to THC and CBD as nabiximols and was  
31 formulated for a consistent and reproducible pharmacokinetic profile, allowing patients to self-  
32 titrate as needed without a concern for a delayed onset. The product will be dosed similarly to the  
33 Duran study, commencing 24 hours prior to chemotherapy to confirm tolerability.  
34  
35

## 36 HYPOTHESIS

### 37 Primary hypothesis

38 We hypothesise that the addition of *TN-TC11M* to standard guideline-based antiemetics will  
39 improve the control of CINV, leading to improved quality of life. The potential resource implications  
40 are of higher CINV regimen drug costs, but reduced costs of the management of refractory CINV  
41 through the reduced need for rescue medications and reduced hospitalisation.  
42  
43

## 44 METHODS AND ANALYSIS

45 The Cannabis for Chemotherapy Induced Nausea and Vomiting (CannabisCINV) trial is an Australian-  
46 based, double-blind, placebo-controlled, two-stage randomised controlled trial. The primary aim is  
47 to determine the efficacy of adding an oral cannabidiol-rich THC extract (*TN-TC11M*) for secondary  
48 prevention of CINV after failure of a guideline consistent prophylactic anti-emetic regimen.  
49

### 50 Study objectives

51 The primary objective of this study is to compare, amongst patients randomised to *TN-TC11M* or  
52 placebo, the ability to control emesis and nausea, as determined by:

- 53  
54 ♦ The proportion of patients achieving a 'complete response' during the overall phase of  
55 treatment (0 – 120 hours), defined as no emesis and no use of rescue medications  
56  
57  
58  
59

The pilot study (cross-over) and definitive trial (parallel) will use different methods of analysis as outlined in the statistical analysis section.

The secondary objectives are to compare, amongst patients randomised to *TN-TC11M* or placebo:

- ◆ Efficacy
  - Proportions of patients during acute (0 – 24 hours), delayed (24 – 120 hours) and overall (0 – 120 hours) phases of cycles A, B and C with (i) complete response, (ii) no emesis (vomiting or dry retching), (iii) no significant nausea, defined as degree of nausea <2 out of 10 using an 11-point rating scale, and (iv) no use of rescue medications
  - Number of emetic episodes during 0 – 120 hours of cycles A, B and C
- ◆ Cannabinoid-related and other adverse events
  - Endpoint: Proportions with specified cannabinoid-related and other adverse events (structured checklist, CTCAE)
- ◆ Health-related quality of life
  - Endpoint: Summary scales (nausea, vomiting) of Functional Living Index-Emesis, and all items of AQOL-8D
- ◆ Regimen's acceptability
  - Endpoint: Adherence (patient diaries, pill counts), preference

The tertiary and correlative objectives are:

- ◆ To compare health system resource use and costs between randomised groups
  - Endpoint: Health system resource use and costs
- ◆ To model the cost-effectiveness of cannabinoid therapy compared to placebo or other anti-emesis alternatives, for prevention of CINV, from the perspective of the healthcare system
  - Endpoint: Health outcomes relative to costs

### **Trial oversight and monitoring**

The CannabisCINV trial is a collaboration between the Chris O'Brien Lifehouse; the National Health and Medical Research Council (NHMRC) Clinical Trials Centre, University of Sydney; and the Lambert Initiative for Cannabinoid Therapeutics, University of Sydney.

The University of Sydney is the study sponsor. The NHMRC Clinical Trials Centre will be responsible for trial coordination, monitoring, site audits, management, data acquisition and statistical analysis. Safety and feasibility endpoints will be reviewed at 3-monthly intervals by the Independent Data and Safety Monitoring Committee (IDSMC) during both the pilot and phase III trial. The IDSMC will assess the rate of serious adverse events (SAEs) (graded  $\geq 3$  by CTCAE criteria) and accrual, with no pause in recruitment planned. Consideration will be given to altering aspects of the study if:

- ◆ The accrual rate is insufficient to complete the study in a reasonable timeframe
- ◆ The rate of SAEs in the oral *TN-TC11M* arm is unacceptably high compared with the placebo arm
- ◆ Medical or ethical reasons emerge affecting continued performance of the study

Protocol amendments can only be made by the Trial Management Committee and must be approved by the institutional Human Research Ethics Committee (HREC) prior to implementation.

### **Patient and public involvement**

Consumer representatives were involved in the development of this trial. The primary and secondary outcomes of this study, including adverse events, are patient reported outcomes, emphasising the focus of this study on patient priorities, experience and preferences. Results of this study will be disseminated to study participants through peer reviewed journals and at scientific conferences.

### **Trial design**

1  
2  
3 The protocol consists of a pilot phase II, double-blinded, randomised, placebo-controlled cross-over  
4 study followed by a planned definitive phase III, blinded, randomised, parallel, placebo-controlled  
5 trial (see figure 1). The pilot trial will be conducted at 10 sites across the state of NSW, Australia, in  
6 both tertiary referral centres and regional centres in outpatient comprehensive cancer care units. A  
7 list of the study sites can be accessed from the Australia and New Zealand Clinical Trials Registry  
8 (ANZCTR).  
9

## 10 Figure 1

### 11 Inclusion criteria

12 Patients who fulfil all of the following characteristics will be considered eligible for enrolment;

- 13 ♦ Adult patients with any malignancy, and
- 14 ♦ Receiving moderate to highly emetogenic intravenous chemotherapy (Day 1) in a 14 or 21-day  
15 cycle, and
- 16 ♦ Experienced significant CINV, defined as requiring  $\geq 1$  dose of rescue medication for vomiting or  
17 distress by nausea, and/or  $\geq$  moderate nausea on a 5-point rating scale, at any time during the  
18 current chemotherapy regimen despite guideline consistent anti-emetics, and
- 19 ♦ Planned for at least 2 further cycles of the same chemotherapy regimen, and
- 20 ♦ ECOG performance status of 2 or less.

### 21 Exclusion criteria

22 Patients with the following characteristics will be excluded from study enrolment:

- 23 ♦ Symptomatic central nervous system/leptomeningeal disease, gastro-intestinal tract obstruction  
24 or disease-related nausea or vomiting requiring daily antiemetic therapy
- 25 ♦ Oral chemotherapy during study treatment (eg. oral capecitabine)
- 26 ♦ Radiotherapy to the brain, abdomen or pelvis within the week prior to commencing study  
27 treatment, or planned during study treatment
- 28 ♦ Contra-indication to cannabinoid treatment
  - 29 ○ Unstable cardiovascular disease (uncontrolled hypertension, unstable ischaemic heart  
30 disease, unstable congestive cardiac failure)
  - 31 ○ History of epilepsy or recurrent seizures
  - 32 ○ History of schizophrenia, other psychotic illness, severe personality disorder, suicidal  
33 ideation, or other significant psychiatric disorder, other than depression associated with  
34 the underlying condition
  - 35 ○ Substance use disorder (ICD-10 criteria of abuse or dependence) to alcohol, opioids,  
36 benzodiazepines, cannabis or illicit stimulants
  - 37 ○ Unwilling/unable to avoid driving or operating heavy machinery during and for up to 72  
38 hours after taking study medication
  - 39 ○ Concerns regarding safe storage of medication
- 40 ♦ Cannabis or cannabinoid-based medications within 30 days of study or unwilling to abstain for  
41 the duration of the study
- 42 ♦ Prior hypersensitivity or intolerable adverse reaction to cannabis or cannabinoid-based  
43 medications, 5HT<sub>3</sub> antagonist, dexamethasone or NK<sub>1</sub> antagonist
- 44 ♦ Pregnancy, lactation, or inadequate contraception. Women must be post-menopausal, infertile,  
45 or use a reliable means of contraception. Women of childbearing potential must have a negative  
46 pregnancy test done within 7 days prior to registration. Men must have been surgically sterilised  
47 or use a (double if required) barrier method of contraception.

### 48 Investigational medical product

49 *TN-TC11M*  
50  
51  
52  
53

This study will use a novel oral THC/CBD capsule formulation ('*TN-TC11M*', Tilray) derived from *Cannabis Sativa L.* extract. It contains Delta-9-Tetrahydrocannabinol (THC) and Cannabidiol (CBD) in a 1:1 ratio, with each oral capsule containing 2.5mg THC and 2.5mg CBD. This is intended to provide equivalent systemic exposures to THC and CBD as those obtained from nabiximols (a single dose of nabiximols which comprises 2.7mg THC and 2.5mg CBD). In contrast to nabiximols, TN-CT11M was formulated for a consistent and reproducible pharmacokinetic profile, allowing patients to self-titrate as needed without a concern for a delayed onset. Investigational product will be dosed similarly to the Duran study<sup>12</sup>, and administration will commence 24 hours prior to chemotherapy to confirm tolerability.

## Placebo

The placebo will be in white capsules, identical in appearance to that of the active treatment.

## Randomisation, allocation concealment and double-blind conditions

Randomisation will be performed centrally using minimization, with stratification by chemotherapy emetogenic risk (moderate vs high by MASCC criteria) and by site.

Pharmaceutical Packaging Professionals (PPP) will store and distribute the drug on behalf of the study sponsor to all participating sites upon receipt of all drug order forms.

## Background treatment

All patients will receive antiemetics including 5HT3 antagonist, corticosteroid, and (where indicated) NK1 antagonist; according to a pre-specified choice of regimen consistent with guidelines from eviQ Cancer Treatments Online<sup>14</sup> and/or MASCC guidelines for optimal anti-emetic prophylaxis of chemotherapy<sup>2</sup>.

The following rescue therapies are permitted:

- ◆ Lorazepam, eg 1mg PO bd (twice a day) prn (when required)
- ◆ Metoclopramide, eg 10mg PO tds (three times a day) prn
- ◆ Haloperidol, eg 0.5 – 1mg PO tds prn
- ◆ Prochlorperazine, eg 5 – 10mg PO tds prn, 25mg sup PR (per rectum) q8h prn
- ◆ Olanzapine, eg 5mg PO bd or 10mg PO mane for 3 days

Note:

- ◆ 5HT3 antagonists should only be used when other rescue therapies have failed

## Recruitment and consent

Patient screening and enrolment undertaken at participating sites will be overseen by the site principal investigator and performed by trained study personnel. A screening log will document all eligible patients screened and approached along with reasons for any exclusions. Patients will provide written informed consent prior to study enrolment.

## Pilot study

The phase II pilot trial (N=80) will be a multi-site, 1:1 randomised, double-blind, placebo-controlled trial (Figure 1). The dosing regimen will be similar to that used in the nabiximols study by Duran et al described above, which was shown to be well tolerated and effective, however patients will also receive study drug for 24 hours prior to chemotherapy to confirm tolerability. It will utilise a crossover design and a significance level of 10% to increase efficiency, and allow patients to nominate a preferred drug in the final cycle.

In the pilot study, during chemotherapy cycle A, subjects will be randomised to receive oral *TN-TC11M* capsules (2.5/2.5mg) TDS from day -1 to 5, or identical placebo capsules, in addition to guideline consistent anti-emetics. For cycle B, subjects will cross-over to receive the alternative formulation in the same schedule.

On treatment, patients will be able to self-titrate their *TN-TC11M*/placebo exposure based on tolerance, with a maximum dose of 30mg/30mg per day (12 tablets) (Table 1). Following cycle B, subjects are asked to nominate their preferred regimen after cycle B, and where relevant will receive that agent with cycle C.

| Table 1: On treatment schedule with dose modifications |                                                                   |              |                                                                                                                                               |                                               |
|--------------------------------------------------------|-------------------------------------------------------------------|--------------|-----------------------------------------------------------------------------------------------------------------------------------------------|-----------------------------------------------|
| Day                                                    | Time                                                              | Dose         | Dose titration                                                                                                                                | Maximum dose per 24-hour period               |
| -1                                                     | Mane                                                              | 1 capsule    | N/A                                                                                                                                           | 5 capsules<br>12.5mg<br>TCH/CBD or<br>placebo |
|                                                        | Midi<br>(at least 4 hours after<br>previous dose)                 | 2 capsules   | Miss dose if intoxicated                                                                                                                      |                                               |
|                                                        | Nocte<br>(at least 4 hours after<br>previous dose)                | 1–2 capsules | Miss dose if intoxicated<br><br>Reduce dose by 1 capsule if<br>previous dose not tolerated<br><br>Maintain dose if previous dose<br>tolerated |                                               |
| 1                                                      | 60 min prior to<br>chemotherapy                                   | 1–2 capsules | Miss dose if intoxicated<br><br>Reduce dose by 1 capsule if<br>previous dose not tolerated                                                    | 8 capsules<br>20mg TCH/CBD<br>or placebo      |
|                                                        | Immediately after<br>completion of Day 1<br>chemotherapy infusion | 1–3 capsules | Maintain dose if previous dose<br>tolerated, with nausea control                                                                              |                                               |
|                                                        | 4 hours after<br>completion of Day 1<br>chemotherapy infusion     | 1–3 capsules | Increase dose by 1 capsule if<br>previous dose tolerated, but<br>inadequate nausea control                                                    |                                               |
| 2                                                      | Continue tds<br>Mane<br>Midi<br>Nocte                             | 1–4 capsules | Miss dose if intoxicated                                                                                                                      | 12 capsules<br>30mg TCH/CBD<br>or placebo     |
| 3                                                      |                                                                   |              | Reduce dose by 1 capsule if<br>previous dose not tolerated                                                                                    |                                               |
| 4                                                      |                                                                   |              | Maintain dose if previous dose<br>tolerated, with nausea control                                                                              |                                               |
| 5                                                      | Mane                                                              | 1–4 capsules | Increase dose by 1 capsule if<br>previous dose tolerated, but<br>inadequate nausea control                                                    | 8 capsules                                    |
|                                                        | Take final dose Midi<br>Day 5                                     |              |                                                                                                                                               | 20mg TCH/CBD<br>or placebo                    |

Table 1 shows the starting dose will be 1 capsule PO on the morning of Day -1, with the next scheduled dose of 2 capsules (if tolerated, at midday), followed by 2 capsules that evening (if tolerated). On Day 1 subjects receive 1–2 capsules 60 minutes prior to chemotherapy infusion, followed by 1–3 capsules immediately after completion of Day 1 infusional chemotherapy, then 1–3 capsules 4 hours after completion of Day 1 infusional chemotherapy. On Days 2-5 subjects take 1-4 tablets TDS, with instruction to dose-titrate according to intoxication, tolerance of prior dose, and nausea control. The final dose is at midday on Day 5, with no further treatment until Day -1 of the next chemotherapy cycle.

### Definitive study

The definitive randomised phase 3 study (N=250) will assess the efficacy of the addition of TN-TC11M to guideline consistent anti-emetics as secondary prevention of CINV. It will have a parallel group design, to reduce bias given the possibility of carry-over effect from cross-over in subsequent cycles, and to investigate longer-term efficacy over multiple chemotherapy cycles.



In the definitive study, during cycle A, subjects will receive oral *TN-TC11M* capsules (2.5/2.5mg) TDS from day -1 to 5, or identical placebo capsules, in the same treatment schedule (see table 1). For cycle B (and C if relevant), subjects will re-commence treatment with the investigational product on their maximum tolerated dose from the previous cycle, with further scope to self-titrate according to symptoms.

### Data acquisition

The participant will be instructed on the use of the patient diary, which has been designed for this study, to record;

- ◆ Nausea (past 24-hour period), recorded using an 11-point rating scale
- ◆ Date, time and type of rescue medication used
- ◆ Vomiting and dry retching episodes

The patient diary will be completed by the patient. There will be daily assessment of patients on days 1 to 6 of each cycle to ensure:

- ◆ Study treatments are taken appropriately
- ◆ Accurate records in the patient diary
- ◆ Completion of structured checklist of cannabinoid-specific adverse events
- ◆ Advice is provided regarding management of any adverse events

Trial data will be recorded on the (e)CRFs provided and will be monitored by clinical trials program staff from the NHMRC Clinical Trials Centre.

### Unblinding and post-study care

Following completion of trial treatment, patients who have experienced benefit and require ongoing treatment with the same chemotherapy regimen may be eligible for ongoing access to *TN-TC11M*, free of charge, contingent on unblinding performed by an unblinded statistician.

## STATISTICAL CONSIDERATIONS

### Sample size estimation

The estimated sample size for the pilot trial is 80 patients (40 per arm), using a primary endpoint of complete response to the study drug and placebo during cycle A and B of treatment. Utilizing a cross-over design, randomising patients to either study drug followed by placebo or placebo followed by study drug, will have 80% power at a 2-sided significance level of 10% to detect a 20% difference in discordant responses (response on one intervention, but not the other). Accrual is expected to take 12 months. The 20% difference is based on the assumption that 42% of patients on the study drug will respond compared with 22% on placebo, and that the responders in the placebo group will respond/not respond equally on the study drug (11% respond on each).

The estimated sample size for the definitive trial is 250 patients (125 per arm), using a primary endpoint of complete response during cycle A of study treatment. A sample size of 250 patients provides 80% power at 2-sided 5% level of significance to detect improvement in complete response from 22% to 42.5%. Accrual is expected to take 2.5 years.

The sample size for each trial will allow for a drop-out/ineligibility rate of 20%.

The current evidence suggests that this level of improvement is both worthwhile and feasible.

### Statistical analysis

#### Pilot study

Analyses will be conducted using intention to treat (ITT) principles. The primary analyses will include all patients who were randomised. Missing values will not be imputed. The results will be examined for differential effect in the two periods and if necessary, the data from cycle A will be analysed separately.

The primary outcome is complete response. The primary analysis will be a comparison of the proportion of patients with a complete response between the two treatments over cycle A and cycle

1  
2  
3 B, using McNemar's test. In the event that there is differential drop-out between period, or a period  
4 by treatment interaction, the results from the first period will be analysed using a chi-square test.  
5 Analyses to assess period by treatment interaction will use Generalised Estimating Equations (GEEs)  
6 to account for the correlation within a patient. Secondary analyses to adjust for any baseline  
7 variables will also use GEEs. All tests will use a two-sided significance level of 10%.

## 8 9 **Definitive study**

10 The primary analyses will include all randomised patients using ITT principles, and compare the  
11 proportion of patients with complete response in the two treatment arms during the overall phase  
12 (0-120 hours) of cycle A, using a Chi-square test. Secondary analyses adjusting for baseline variables  
13 will use GEEs. Binary secondary outcomes will be analysed as for the primary outcome. Count data  
14 will be analysed using a Generalised Linear Model with a Poisson distribution. Cannabinoid-related  
15 adverse events and measures of adherence will be analysed with a chi-square test or two-sample t-  
16 test or just listed depending on numbers. All tests will use a two-sided significance level of 5%.

## 17 18 19 **Health economic analysis**

20 A within-trial and modelled economic evaluation will be undertaken to determine the incremental  
21 cost-effectiveness of oral cannabinoid therapy compared to placebo and other anti-emetic  
22 therapies, from a health system perspective.

23 For the within-trial analysis, resource use will be identified and measured from trial case report  
24 forms (for hospitalisations), and through linkage to Medicare claims data for outpatient visits (MBS)  
25 and prescribed medicines (PBS). Australian unit costs will be applied to the resource usage data (e.g.  
26 Australian Refined Diagnostic Related Groups (AR-DRG), and Medicare scheduled fees using the  
27 most recent reference year). For the modelled evaluation, resource use will be taken from the trial  
28 data for cannabinoid and placebo therapies, and supplemented with published estimates of  
29 resource use and costs for alternative 'usual care' anti-emetic therapies.

30  
31 The definitive study will employ a health economic analysis which will use the proportion of patients  
32 with 'complete response' (i.e. participants with no emesis and no use of rescue medications,  
33 consistent with the primary endpoint); quality of life as measured by the FLIE with 5-day recall and  
34 AQOL-8D instruments<sup>15</sup>, and quality-adjusted survival. Quality-adjusted survival time will be used to  
35 quantify the incremental effectiveness of cannabinoid treatment. Quality-adjusted survival will be  
36 calculated by applying utility weights for quality of life derived from the AQOL-8D utility instrument  
37 to survival data using established methods. In addition, we will conduct a sensitivity analysis to  
38 determine the incremental costs to achieve an outcome of no significant nausea, no emesis and no  
39 use of rescue medications.

40  
41 Two cost-effectiveness outcomes will be reported: 1) the incremental cost per additional complete  
42 responder (trial primary endpoint) at 30 days after last dose of study drug, and 2) the incremental  
43 cost per quality-adjusted life year (QALY) gained at 12 months, using extrapolated data. These will  
44 be expressed as incremental cost-effectiveness ratios and plotted on a cost-effectiveness plane.  
45 Bootstrapping will be used to estimate a distribution around costs and health outcomes, and to  
46 calculate confidence intervals around incremental cost-effectiveness ratios<sup>16</sup>. A cost-effectiveness  
47 acceptability curve (CEAC) will be plotted, providing information about the probability that the  
48 intervention is cost-effective given the Australian Government's willingness to pay for a QALY  
49 gained<sup>17</sup>. One-way, two-way and probabilistic sensitivity analyses will be undertaken for relevant  
50 variables, including cost of the study drug.

## 51 52 **ETHICS AND DISSEMINATION**

### 53 **Approval and patient-informed consent**

54 In Australia, the study will be conducted according to the Note for Guidance on Good Clinical Practice  
55 (CPMP/ICH/135/95) annotated with TGA comments (Therapeutic Goods Administration DSEB July  
56  
57  
58  
59

2000) and in compliance with applicable laws and regulations. The study will be performed in accordance with the NHMRC Statement on Ethical Conduct in Research Involving Humans 2007 – updated May 2015, the NHMRC Australian Code for the Responsible Conduct of Research 2007, and the principles laid down by the World Medical Assembly in the Declaration of Helsinki 2008.

To this end, no patient will be recruited to the study until all the necessary approvals have been obtained and the patient has provided written informed consent. Further, the investigator shall comply with the protocol, except when a protocol deviation is required to eliminate immediate hazard to a participant. In this circumstance the NHMRC CTC, principal investigator and HREC must be advised immediately.

## TRIAL STATUS

Patient enrolment for the pilot study commenced in November 2016 at the Chris O'Brien Lifehouse in NSW, Australia, with the 10<sup>th</sup> NSW site opened in June 2017. To date 49 patients have been enrolled, with anticipated pilot study enrolment completion by 3<sup>rd</sup> quarter 2018.

**Acknowledgements** Special study personnel, patients and their families

**Contributors** PG, PSH, MS, NL, JS, IM, IO, DJA, CG, AK, were responsible for study concept (grant authors). PG, PSH, MS, NL, JS, IM, IO, DJA, CG, AK, RML, NW were responsible for protocol development. PG, AT, AM, NW, AW, CH, AK, MS, CG, PF, SC, KB and MA were responsible for study conduct.

**Funding** NSW Department of Health, drug supply by Tilray

**Drug supply** Tilray

**Protocol version** 2.0, 9<sup>th</sup> June 2017

**Data access** Data access will be restricted to NHMRC Clinical Trials Centre staff

**Competing interests** No authors disclosed a relevant conflict of interest

**Ethics approval** Sydney Local Health District ethics review committee (Royal Prince Alfred Hospital zone).

**Dissemination policy** Results will be communicated by a writing committee appointment by the trial management committee and disseminated in peer-reviewed journals and at scientific conferences

**Provenance and peer review** Not commissioned; externally peer reviewed

**Data sharing statement** This is a protocol paper, and no analysed results are available at this time

**Open access** This is an open access article distributed in accordance with the Creative Commons Attribution Non-Commercial (CC BY-NC 4.0) license, which permits others to distribute, remix, adapt, build upon this work non-commercially, and license their derivative works on different terms, provided the original work is properly cited and the use is non-commercial. See <http://creativecommons.org/licenses/by-nc/4.0/>

## REFERENCES

1. Navari RM, Aapro M. Antiemetic prophylaxis for chemotherapy-induced nausea and vomiting. *New England Journal of Medicine* 2016;374(14):1356-67.
2. Multinational Association of Supportive Care in Cancer. MASCC/ESMO Antiemetic guideline 2016 [Available from: <http://www.mascc.org/antiemetic-guidelines> accessed 21 Aug 2017.
3. Roila F, Herrstedt J, Aapro M, et al. Guideline update for MASCC and ESMO in the prevention of chemotherapy- and radiotherapy-induced nausea and vomiting: results of the Perugia consensus conference. *Annals of Oncology* 2010;21(suppl\_5):v232-v43.
4. Gilmore JW, Peacock NW, Gu A, et al. Antiemetic guideline consistency and incidence of chemotherapy-induced nausea and vomiting in US community oncology practice: INSPIRE Study. *Journal of Oncology Practice* 2013;10(1):68-74.
5. Molassiotis A, Saunders MP, Valle J, et al. A prospective observational study of chemotherapy-related nausea and vomiting in routine practice in a UK cancer centre. *Supportive Care in Cancer* 2008;16(2):201-08.

- 1  
2  
3 6. Aapro M, Molassiotis A, Dicato M, et al. The effect of guideline-consistent antiemetic therapy  
4 on chemotherapy-induced nausea and vomiting (CINV): the Pan European Emesis Registry  
5 (PEER). *Annals of Oncology* 2012;23(8):1986-92.
- 6  
7 7. Frame D. Best practice management of CINV in oncology patients: I. Physiology and treatment  
8 of CINV. Multiple neurotransmitters and receptors and the need for combination therapeutic  
9 approaches. *The journal of supportive oncology* 2010;8(2 Suppl 1):5-9.
- 10  
11 8. Penington DG. Medical cannabis: time for clear thinking. *Medical Journal of Australia*  
12 2015;202(2):74-76.
- 13  
14 9. Kramer JL. Medical marijuana for cancer. *CA: a cancer journal for clinicians* 2015;65(2):109-  
15 22.
- 16  
17 10. Bhattacharyya S, Morrison PD, Fusar-Poli P, et al. Opposite effects of  $\Delta$ -9-  
18 tetrahydrocannabinol and cannabidiol on human brain function and psychopathology.  
19 *Neuropsychopharmacology* 2010;35(3):764.
- 20  
21 11. Allsop DJ, Copeland J, Lintzeris N, et al. Nabiximols as an agonist replacement therapy during  
22 cannabis withdrawal: a randomized clinical trial. *JAMA psychiatry* 2014;71(3):281-91.
- 23  
24 12. Duran M, Pérez E, Abanades S, et al. Preliminary efficacy and safety of an oromucosal  
25 standardized cannabis extract in chemotherapy-induced nausea and vomiting. *British journal of*  
26 *clinical pharmacology* 2010;70(5):656-63.
- 27  
28 13. Herzog S, Shanahan M, Grimison P, et al. Systematic Review of the Costs and Benefits of  
29 Prescribed Cannabis-Based Medicines for the Management of Chronic Illness: Lessons from  
30 Multiple Sclerosis. *PharmacoEconomics* 2017 doi: 10.1007/s40273-017-0565-6
- 31  
32 14. Cancer Institute of New South Wales. Prevention of chemotherapy induced nausea and  
33 vomiting 2017 [updated 30 Aug 2017. Available from: [https://www.eviq.org.au/clinical-  
34 resources/side-effect-and-toxicity-management/gastrointestinal/7-prevention-of-  
35 chemotherapy-induced-nausea-and-vomiting](https://www.eviq.org.au/clinical-resources/side-effect-and-toxicity-management/gastrointestinal/7-prevention-of-chemotherapy-induced-nausea-and-vomiting) accessed 30 Oct 2017.
- 36  
37 15. Richardson J, Iezzi A, Khan MA, et al. Validity and reliability of the Assessment of Quality of  
38 Life (AQoL)-8D multi-attribute utility instrument. *The Patient-Patient-Centered Outcomes*  
39 *Research* 2014;7(1):85-96.
- 40  
41 16. Campbell M, Torgerson D. Bootstrapping: estimating confidence intervals for cost-  
42 effectiveness ratios. *Qjm* 1999;92(3):177-82.
- 43  
44 17. Fenwick E, O'Brien BJ, Briggs A. Cost-effectiveness acceptability curves—facts, fallacies and  
45 frequently asked questions. *Health economics* 2004;13(5):405-15.

1  
2  
3  
4  
5  
6  
7  
8  
9  
10  
11  
12  
13  
14  
15  
16  
17  
18  
19  
20  
21  
22  
23  
24  
25  
26  
27  
28  
29  
30  
31  
32  
33  
34  
35  
36  
37  
38  
39  
40  
41  
42  
43  
44  
45  
46  
47  
48  
49  
50  
51  
52  
53  
54  
55  
56  
57  
58  
59  
60

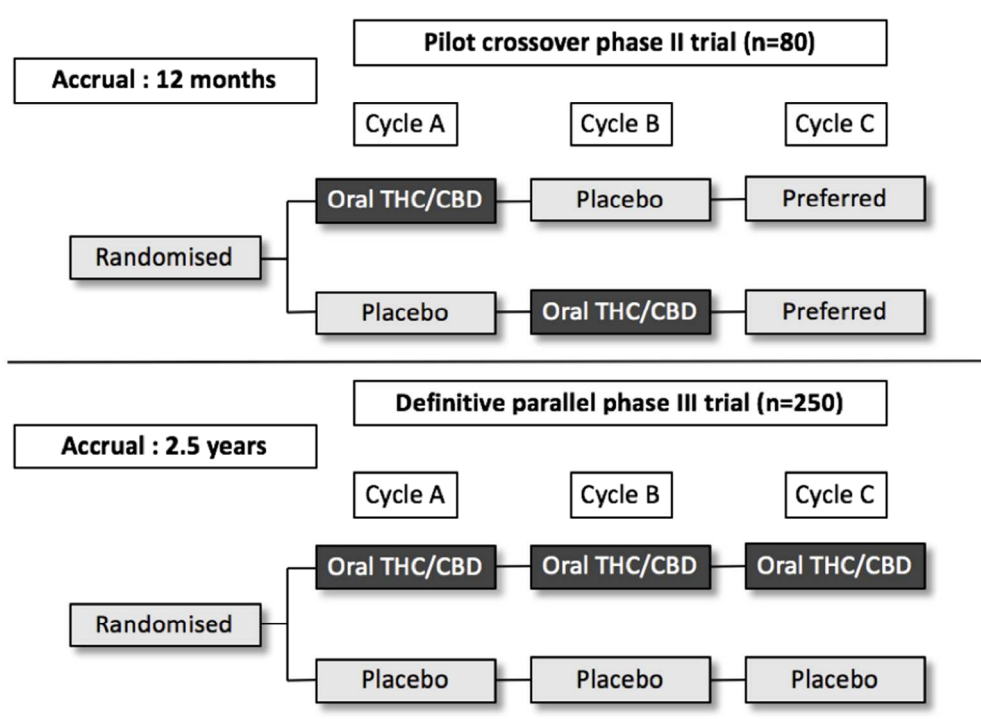

Figure 1 - Study schema

157x115mm (150 x 150 DPI)

Preprint only

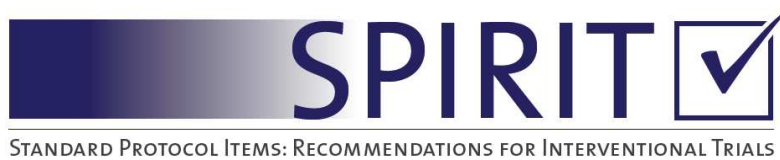

SPIRIT 2013 Checklist: Recommended items to address in a clinical trial protocol and related documents\*

| Section/item                      | Item No | Description                                                                                                                                                                                                                                                                                       |
|-----------------------------------|---------|---------------------------------------------------------------------------------------------------------------------------------------------------------------------------------------------------------------------------------------------------------------------------------------------------|
| <b>Administrative information</b> |         |                                                                                                                                                                                                                                                                                                   |
| Title                             | 1       | Descriptive title identifying the study design, population, interventions, and, if applicable, trial acronym (page 1)                                                                                                                                                                             |
| Trial registration                | 2a      | Trial identifier and registry name. If not yet registered, name of intended registry (page 2)                                                                                                                                                                                                     |
|                                   | 2b      | All items from the World Health Organization Trial Registration Data Set                                                                                                                                                                                                                          |
| Protocol version                  | 3       | Date and version identifier (Page 10)                                                                                                                                                                                                                                                             |
| Funding                           | 4       | Sources and types of financial, material, and other support (page 10)                                                                                                                                                                                                                             |
| Roles and responsibilities        | 5a      | Names, affiliations, and roles of protocol contributors (pages 1 and 10)                                                                                                                                                                                                                          |
|                                   | 5b      | Name and contact information for the trial sponsor (page 1)                                                                                                                                                                                                                                       |
|                                   | 5c      | Role of study sponsor and funders, if any, in study design; collection, management, analysis, and interpretation of data; writing of the report; and the decision to submit the report for publication, including whether they will have ultimate authority over any of these activities (page 9) |
|                                   | 5d      | Composition, roles, and responsibilities of the coordinating centre, steering committee, endpoint adjudication committee, data management team, and other individuals or groups overseeing the trial, if applicable (see Item 21a for data monitoring committee) (page 4)                         |
| <b>Introduction</b>               |         |                                                                                                                                                                                                                                                                                                   |
| Background and rationale          | 6a      | Description of research question and justification for undertaking the trial, including summary of relevant studies (published and unpublished) examining benefits and harms for each intervention (page 2 and 3)                                                                                 |
|                                   | 6b      | Explanation for choice of comparators (page 3)                                                                                                                                                                                                                                                    |
| Objectives                        | 7       | Specific objectives or hypotheses (page 3 and 4)                                                                                                                                                                                                                                                  |

1  
2  
3  
4  
5  
6  
7  
8  
9  
10  
11  
12  
13  
14  
15  
16  
17  
18  
19  
20  
21  
22  
23  
24  
25  
26  
27  
28  
29  
30  
31  
32  
33  
34  
35  
36  
37  
38  
39  
40  
41  
42  
43  
44  
45  
46  
47  
48  
49  
50  
51  
52  
53  
54  
55  
56  
57  
58  
59  
60

|              |   |                                                                                                                                                                                                                              |
|--------------|---|------------------------------------------------------------------------------------------------------------------------------------------------------------------------------------------------------------------------------|
| Trial design | 8 | Description of trial design including type of trial (eg, parallel group, crossover, factorial, single group), allocation ratio, and framework (eg, superiority, equivalence, noninferiority, exploratory) (pages 4, 7 and 8) |
|--------------|---|------------------------------------------------------------------------------------------------------------------------------------------------------------------------------------------------------------------------------|

### Methods: Participants, interventions, and outcomes

|               |   |                                                                                                                                                                                             |
|---------------|---|---------------------------------------------------------------------------------------------------------------------------------------------------------------------------------------------|
| Study setting | 9 | Description of study settings (eg, community clinic, academic hospital) and list of countries where data will be collected. Reference to where list of study sites can be obtained (page 4) |
|---------------|---|---------------------------------------------------------------------------------------------------------------------------------------------------------------------------------------------|

|                      |    |                                                                                                                                                                                                              |
|----------------------|----|--------------------------------------------------------------------------------------------------------------------------------------------------------------------------------------------------------------|
| Eligibility criteria | 10 | Inclusion and exclusion criteria for participants. If applicable, eligibility criteria for study centres and individuals who will perform the interventions (eg, surgeons, psychotherapists) (pages 4 and 5) |
|----------------------|----|--------------------------------------------------------------------------------------------------------------------------------------------------------------------------------------------------------------|

|               |     |                                                                                                                                               |
|---------------|-----|-----------------------------------------------------------------------------------------------------------------------------------------------|
| Interventions | 11a | Interventions for each group with sufficient detail to allow replication, including how and when they will be administered (pages 5, 6 and 7) |
|---------------|-----|-----------------------------------------------------------------------------------------------------------------------------------------------|

|  |     |                                                                                                                                                                                                                |
|--|-----|----------------------------------------------------------------------------------------------------------------------------------------------------------------------------------------------------------------|
|  | 11b | Criteria for discontinuing or modifying allocated interventions for a given trial participant (eg, drug dose change in response to harms, participant request, or improving/worsening disease) (pages 6 and 7) |
|--|-----|----------------------------------------------------------------------------------------------------------------------------------------------------------------------------------------------------------------|

|  |     |                                                                                                                                                                   |
|--|-----|-------------------------------------------------------------------------------------------------------------------------------------------------------------------|
|  | 11c | Strategies to improve adherence to intervention protocols, and any procedures for monitoring adherence (eg, drug tablet return, laboratory tests) (pages 7 and 8) |
|--|-----|-------------------------------------------------------------------------------------------------------------------------------------------------------------------|

|  |     |                                                                                                        |
|--|-----|--------------------------------------------------------------------------------------------------------|
|  | 11d | Relevant concomitant care and interventions that are permitted or prohibited during the trial (page 6) |
|--|-----|--------------------------------------------------------------------------------------------------------|

|          |    |                                                                                                                                                                                                                                                                                                                                                                                                        |
|----------|----|--------------------------------------------------------------------------------------------------------------------------------------------------------------------------------------------------------------------------------------------------------------------------------------------------------------------------------------------------------------------------------------------------------|
| Outcomes | 12 | Primary, secondary, and other outcomes, including the specific measurement variable (eg, systolic blood pressure), analysis metric (eg, change from baseline, final value, time to event), method of aggregation (eg, median, proportion), and time point for each outcome. Explanation of the clinical relevance of chosen efficacy and harm outcomes is strongly recommended (page 3, 4, 7, 8 and 9) |
|----------|----|--------------------------------------------------------------------------------------------------------------------------------------------------------------------------------------------------------------------------------------------------------------------------------------------------------------------------------------------------------------------------------------------------------|

|                      |    |                                                                                                                                                                                                                       |
|----------------------|----|-----------------------------------------------------------------------------------------------------------------------------------------------------------------------------------------------------------------------|
| Participant timeline | 13 | Time schedule of enrolment, interventions (including any run-ins and washouts), assessments, and visits for participants. A schematic diagram is highly recommended (see Figure) (page 4, figure 1, pages 6, 7 and 8) |
|----------------------|----|-----------------------------------------------------------------------------------------------------------------------------------------------------------------------------------------------------------------------|

|             |    |                                                                                                                                                                                                      |
|-------------|----|------------------------------------------------------------------------------------------------------------------------------------------------------------------------------------------------------|
| Sample size | 14 | Estimated number of participants needed to achieve study objectives and how it was determined, including clinical and statistical assumptions supporting any sample size calculations (page 8 and 9) |
|-------------|----|------------------------------------------------------------------------------------------------------------------------------------------------------------------------------------------------------|

|             |    |                                                                                              |
|-------------|----|----------------------------------------------------------------------------------------------|
| Recruitment | 15 | Strategies for achieving adequate participant enrolment to reach target sample size (page 4) |
|-------------|----|----------------------------------------------------------------------------------------------|

### Methods: Assignment of interventions (for controlled trials)

Allocation:

|    |                |     |                                                                         |
|----|----------------|-----|-------------------------------------------------------------------------|
| 1  |                |     |                                                                         |
| 2  | Sequence       | 16a | Method of generating the allocation sequence (eg, computer-             |
| 3  | generation     |     | generated random numbers), and list of any factors for stratification.  |
| 4  |                |     | To reduce predictability of a random sequence, details of any planned   |
| 5  |                |     | restriction (eg, blocking) should be provided in a separate document    |
| 6  |                |     | that is unavailable to those who enrol participants or assign           |
| 7  |                |     | interventions (page 6)                                                  |
| 8  |                |     |                                                                         |
| 9  | Allocation     | 16b | Mechanism of implementing the allocation sequence (eg, central          |
| 10 | concealment    |     | telephone; sequentially numbered, opaque, sealed envelopes),            |
| 11 | mechanism      |     | describing any steps to conceal the sequence until interventions are    |
| 12 |                |     | assigned (page 6)                                                       |
| 13 |                |     |                                                                         |
| 14 | Implementation | 16c | Who will generate the allocation sequence, who will enrol participants, |
| 15 |                |     | and who will assign participants to interventions (page 6)              |
| 16 |                |     |                                                                         |
| 17 | Blinding       | 17a | Who will be blinded after assignment to interventions (eg, trial        |
| 18 | (masking)      |     | participants, care providers, outcome assessors, data analysts), and    |
| 19 |                |     | how (page 5 and 6)                                                      |
| 20 |                |     |                                                                         |
| 21 |                | 17b | If blinded, circumstances under which unblinding is permissible, and    |
| 22 |                |     | procedure for revealing a participant's allocated intervention during   |
| 23 |                |     | the trial (page 8)                                                      |
| 24 |                |     |                                                                         |
| 25 |                |     |                                                                         |

### Methods: Data collection, management, and analysis

|    |                 |     |                                                                          |
|----|-----------------|-----|--------------------------------------------------------------------------|
| 26 |                 |     |                                                                          |
| 27 |                 |     |                                                                          |
| 28 | Data collection | 18a | Plans for assessment and collection of outcome, baseline, and other      |
| 29 | methods         |     | trial data, including any related processes to promote data quality (eg, |
| 30 |                 |     | duplicate measurements, training of assessors) and a description of      |
| 31 |                 |     | study instruments (eg, questionnaires, laboratory tests) along with      |
| 32 |                 |     | their reliability and validity, if known. Reference to where data        |
| 33 |                 |     | collection forms can be found, if not in the protocol (page 7 and 8)     |
| 34 |                 |     |                                                                          |
| 35 |                 | 18b | Plans to promote participant retention and complete follow-up,           |
| 36 |                 |     | including list of any outcome data to be collected for participants who  |
| 37 |                 |     | discontinue or deviate from intervention protocols (page 7 and 8)        |
| 38 |                 |     |                                                                          |
| 39 | Data            | 19  | Plans for data entry, coding, security, and storage, including any       |
| 40 | management      |     | related processes to promote data quality (eg, double data entry;        |
| 41 |                 |     | range checks for data values). Reference to where details of data        |
| 42 |                 |     | management procedures can be found, if not in the protocol (page 8)      |
| 43 |                 |     |                                                                          |
| 44 |                 |     |                                                                          |
| 45 | Statistical     | 20a | Statistical methods for analysing primary and secondary outcomes.        |
| 46 | methods         |     | Reference to where other details of the statistical analysis plan can be |
| 47 |                 |     | found, if not in the protocol (pages 8 and 9)                            |
| 48 |                 |     |                                                                          |
| 49 |                 | 20b | Methods for any additional analyses (eg, subgroup and adjusted           |
| 50 |                 |     | analyses) (pages 8 and 9)                                                |
| 51 |                 |     |                                                                          |
| 52 |                 | 20c | Definition of analysis population relating to protocol non-adherence     |
| 53 |                 |     | (eg, as randomised analysis), and any statistical methods to handle      |
| 54 |                 |     | missing data (eg, multiple imputation) (pages 8 and 9)                   |
| 55 |                 |     |                                                                          |
| 56 |                 |     |                                                                          |
| 57 |                 |     |                                                                          |
| 58 |                 |     |                                                                          |
| 59 |                 |     |                                                                          |
| 60 |                 |     |                                                                          |



**Methods: Monitoring**

- 1  
2  
3  
4  
5  
6  
7  
8  
9  
10  
11  
12  
13  
14  
15  
16  
17  
18  
19  
20  
21  
22
- |                 |     |                                                                                                                                                                                                                                                                                                                                                |
|-----------------|-----|------------------------------------------------------------------------------------------------------------------------------------------------------------------------------------------------------------------------------------------------------------------------------------------------------------------------------------------------|
| Data monitoring | 21a | Composition of data monitoring committee (DMC); summary of its role and reporting structure; statement of whether it is independent from the sponsor and competing interests; and reference to where further details about its charter can be found, if not in the protocol. Alternatively, an explanation of why a DMC is not needed (page 4) |
|                 | 21b | Description of any interim analyses and stopping guidelines, including who will have access to these interim results and make the final decision to terminate the trial (pages 8 and 9)                                                                                                                                                        |
| Harms           | 22  | Plans for collecting, assessing, reporting, and managing solicited and spontaneously reported adverse events and other unintended effects of trial interventions or trial conduct (page 4)                                                                                                                                                     |
| Auditing        | 23  | Frequency and procedures for auditing trial conduct, if any, and whether the process will be independent from investigators and the sponsor (page 4)                                                                                                                                                                                           |

**Ethics and dissemination**

- 23  
24  
25  
26  
27  
28  
29  
30  
31  
32  
33  
34  
35  
36  
37  
38  
39  
40  
41  
42  
43  
44  
45  
46  
47  
48  
49  
50  
51  
52  
53  
54  
55  
56  
57  
58  
59  
60
- |                               |     |                                                                                                                                                                                                                                           |
|-------------------------------|-----|-------------------------------------------------------------------------------------------------------------------------------------------------------------------------------------------------------------------------------------------|
| Research ethics approval      | 24  | Plans for seeking research ethics committee/institutional review board (REC/IRB) approval (page 9)                                                                                                                                        |
| Protocol amendments           | 25  | Plans for communicating important protocol modifications (eg, changes to eligibility criteria, outcomes, analyses) to relevant parties (eg, investigators, REC/IRBs, trial participants, trial registries, journals, regulators) (page 9) |
| Consent or assent             | 26a | Who will obtain informed consent or assent from potential trial participants or authorised surrogates, and how (see Item 32) (page 9)                                                                                                     |
|                               | 26b | Additional consent provisions for collection and use of participant data and biological specimens in ancillary studies, if applicable (pages 8 and 9)                                                                                     |
| Confidentiality               | 27  | How personal information about potential and enrolled participants will be collected, shared, and maintained in order to protect confidentiality before, during, and after the trial (page 10)                                            |
| Declaration of interests      | 28  | Financial and other competing interests for principal investigators for the overall trial and each study site (page 9)                                                                                                                    |
| Access to data                | 29  | Statement of who will have access to the final trial dataset, and disclosure of contractual agreements that limit such access for investigators (page 10)                                                                                 |
| Ancillary and post-trial care | 30  | Provisions, if any, for ancillary and post-trial care, and for compensation to those who suffer harm from trial participation (page 8)                                                                                                    |

- 1  
2  
3  
4  
5  
6  
7  
8  
9  
10  
11  
12  
13
- |                      |     |                                                                                                                                                                                                                                                                                                     |
|----------------------|-----|-----------------------------------------------------------------------------------------------------------------------------------------------------------------------------------------------------------------------------------------------------------------------------------------------------|
| Dissemination policy | 31a | Plans for investigators and sponsor to communicate trial results to participants, healthcare professionals, the public, and other relevant groups (eg, via publication, reporting in results databases, or other data sharing arrangements), including any publication restrictions (pages 2 and 9) |
|                      | 31b | Authorship eligibility guidelines and any intended use of professional writers (Page 10)                                                                                                                                                                                                            |
|                      | 31c | Plans, if any, for granting public access to the full protocol, participant-level dataset, and statistical code (page 10)                                                                                                                                                                           |

## 14 Appendices

- 15  
16  
17  
18  
19  
20  
21  
22
- |                            |    |                                                                                                                                                                                                                 |
|----------------------------|----|-----------------------------------------------------------------------------------------------------------------------------------------------------------------------------------------------------------------|
| Informed consent materials | 32 | Model consent form and other related documentation given to participants and authorised surrogates                                                                                                              |
| Biological specimens       | 33 | Plans for collection, laboratory evaluation, and storage of biological specimens for genetic or molecular analysis in the current trial and for future use in ancillary studies, if applicable (not applicable) |

---

23 \*It is strongly recommended that this checklist be read in conjunction with the SPIRIT 2013  
24 Explanation & Elaboration for important clarification on the items. Amendments to the  
25 protocol should be tracked and dated. The SPIRIT checklist is copyrighted by the SPIRIT  
26 Group under the Creative Commons "[Attribution-NonCommercial-NoDerivs 3.0 Unported](#)"  
27 license.  
28  
29  
30  
31  
32  
33  
34  
35  
36  
37  
38  
39  
40  
41  
42  
43  
44  
45  
46  
47  
48  
49  
50  
51  
52  
53  
54  
55  
56  
57  
58  
59  
60

# BMJ Open

## Oral cannabinoid-rich THC/CBD cannabis extract for secondary prevention of chemotherapy-induced nausea and vomiting: a study protocol for a pilot and definitive randomised double-blind placebo-controlled trial (CannabisCINV)

|                                 |                                                                                                                                                                                                                                                                                                                                                                                                                                                                                                                                                                                                                                                                                                                                                                                                                                                                                                                                                                                                                                                                                                                                                                                                                                                                                                                                                                                                                                                                                                                                                                                                                                                                                                                                                                                                                                                                                                                                                                                                                                                                                                                                                |
|---------------------------------|------------------------------------------------------------------------------------------------------------------------------------------------------------------------------------------------------------------------------------------------------------------------------------------------------------------------------------------------------------------------------------------------------------------------------------------------------------------------------------------------------------------------------------------------------------------------------------------------------------------------------------------------------------------------------------------------------------------------------------------------------------------------------------------------------------------------------------------------------------------------------------------------------------------------------------------------------------------------------------------------------------------------------------------------------------------------------------------------------------------------------------------------------------------------------------------------------------------------------------------------------------------------------------------------------------------------------------------------------------------------------------------------------------------------------------------------------------------------------------------------------------------------------------------------------------------------------------------------------------------------------------------------------------------------------------------------------------------------------------------------------------------------------------------------------------------------------------------------------------------------------------------------------------------------------------------------------------------------------------------------------------------------------------------------------------------------------------------------------------------------------------------------|
| Journal:                        | <i>BMJ Open</i>                                                                                                                                                                                                                                                                                                                                                                                                                                                                                                                                                                                                                                                                                                                                                                                                                                                                                                                                                                                                                                                                                                                                                                                                                                                                                                                                                                                                                                                                                                                                                                                                                                                                                                                                                                                                                                                                                                                                                                                                                                                                                                                                |
| Manuscript ID                   | bmjopen-2017-020745.R2                                                                                                                                                                                                                                                                                                                                                                                                                                                                                                                                                                                                                                                                                                                                                                                                                                                                                                                                                                                                                                                                                                                                                                                                                                                                                                                                                                                                                                                                                                                                                                                                                                                                                                                                                                                                                                                                                                                                                                                                                                                                                                                         |
| Article Type:                   | Protocol                                                                                                                                                                                                                                                                                                                                                                                                                                                                                                                                                                                                                                                                                                                                                                                                                                                                                                                                                                                                                                                                                                                                                                                                                                                                                                                                                                                                                                                                                                                                                                                                                                                                                                                                                                                                                                                                                                                                                                                                                                                                                                                                       |
| Date Submitted by the Author:   | 07-Jun-2018                                                                                                                                                                                                                                                                                                                                                                                                                                                                                                                                                                                                                                                                                                                                                                                                                                                                                                                                                                                                                                                                                                                                                                                                                                                                                                                                                                                                                                                                                                                                                                                                                                                                                                                                                                                                                                                                                                                                                                                                                                                                                                                                    |
| Complete List of Authors:       | <p>Mersiades, Antony; University of Sydney, NHMRC Clinical Trials Centre<br/> Tognela, Annette; South Western Sydney Local Health District, Macarthur Cancer Therapy Centre, Campbelltown Hospital<br/> Haber, Paul; University of Sydney - Camperdown and Darlington Campus, Discipline of Addiction medicine; Sydney Local Health District, Drug Health Services<br/> Stockler, Martin; University of Sydney , NHMRC Clinical Trials Centre; Sydney Local Health District, Dept of Medical Oncology, Concord Cancer Care Centre<br/> Lintzeris, Nicholas; South East Sydney Local Health District, The Langton Centre; University of Sydney - Camperdown and Darlington Campus, Discipline of Addiction Medicine<br/> Simes, John; University of Sydney, NHMRC Clinical Trials Centre; Chris O'Brien Lifehouse, Dept of Medical Oncology<br/> McGregor, Iain; University of Sydney, Lambert Initiative for Cannabinoid Therapeutics<br/> Olver, Ian; University of South Australia, Sansom Institute for Health Research<br/> Allsop, David; University of Sydney, Lambert Initiative for Cannabinoid Therapeutics<br/> Gedye, Craig; Calvary Mater Newcastle, Dept of Medical Oncology<br/> Kirby, Adrienne; University of Sydney, NHMRC Clinical Trials Centre<br/> Morton, Rachael; The University of Sydney, NHMRC Clinical Trials Centre<br/> Fox, Peter; Orange Health Service, Central West Cancer Care Centre<br/> Clarke, Stephen; North Sydney Local Health District, Dept of Medical Oncology, Royal North Shore Hospital; Kolling Institute of Medical Research<br/> Briscoe, Karen; Mid North Coast Local Health District, Mid North Coast Cancer Institute<br/> Aghmesheh, Morteza; Illawarra Shoalhaven Local Health District, Illawarra Shoalhaven Cancer and Haematology Network, Wollongong Hospital<br/> Wong, Nicole; University of Sydney, NHMRC Clinical Trials Centre<br/> Walsh, Anna; University of Sydney, NHMRC Clinical Trials Centre<br/> Hahn, Carmel; Chris O'Brien Lifehouse<br/> Grimison, Peter; University of Sydney, NHMRC Clinical Trials Centre; Chris O'Brien Lifehouse, Dept of Medical Oncology</p> |
| <b>Primary Subject Heading</b>: | Oncology                                                                                                                                                                                                                                                                                                                                                                                                                                                                                                                                                                                                                                                                                                                                                                                                                                                                                                                                                                                                                                                                                                                                                                                                                                                                                                                                                                                                                                                                                                                                                                                                                                                                                                                                                                                                                                                                                                                                                                                                                                                                                                                                       |

1  
2  
3  
4  
5  
6  
7  
8  
9  
10  
11  
12  
13  
14  
15  
16  
17  
18  
19  
20  
21  
22  
23  
24  
25  
26  
27  
28  
29  
30  
31  
32  
33  
34  
35  
36  
37  
38  
39  
40  
41  
42  
43  
44  
45  
46  
47  
48  
49  
50  
51  
52  
53  
54  
55  
56  
57  
58  
59  
60

|                            |                                                                                                          |
|----------------------------|----------------------------------------------------------------------------------------------------------|
| Secondary Subject Heading: | Palliative care                                                                                          |
| Keywords:                  | Cannabis, Cannabidiol, Chemotherapy-induced nausea and vomiting, Randomized trial, Antiemetic, Marijuana |
|                            |                                                                                                          |

SCHOLARONE™  
Manuscripts

For peer review only

# Oral cannabinoid-rich THC/CBD cannabis extract for secondary prevention of chemotherapy-induced nausea and vomiting: a study protocol for a pilot and definitive randomised double-blind placebo-controlled trial (CannabisCINV)

**Author** Dr Antony J Mersiades

**Co-authors** Dr Annette Tognela, Prof Paul S Haber, Prof Martin Stockler, Prof Nicholas Lintzeris, Prof John Simes, Prof Iain McGregor, Prof Ian Olver, Dr David J Allsop, Prof Craig Gedye, Ms Adrienne Kirby, Dr Rachael L Morton, Dr Peter Fox, Prof Stephen Clarke, Dr Karen Briscoe, Dr Morteza Aghmesheh, Ms Nicole Wong, Mrs Anna Walsh, Carmel Hahn, A/Prof Peter Grimison

**Trial sponsor** University of Sydney

## Corresponding author

Dr Antony J Mersiades

NHMRC Clinical Trials Centre, University of Sydney

Lifthouse, Level 6, 119-143 Missenden Road, Camperdown, NSW, Australia, 2050

Email [antony.mersiades@gmail.com](mailto:antony.mersiades@gmail.com)

Phone +612 9562 5000

## Author affiliations

<sup>1</sup>NHMRC Clinical Trials Centre, University of Sydney, NSW, Australia

<sup>2</sup>Macarthur Cancer Therapy Centre, Campbelltown Hospital, NSW, Australia

<sup>3</sup>Discipline of Addiction Medicine, University of Sydney, NSW, Australia

<sup>4</sup>Drug Health Services, Sydney Local Health District, NSW, Australia

<sup>5</sup>Dept of Medical Oncology, Chris O'Brien Lifthouse, NSW, Australia

<sup>6</sup>Dept of Medical Oncology, Concord Cancer Care Centre, Concord Hospital, NSW, Australia

<sup>7</sup>Drug and Alcohol Services, South East Sydney Local Health District, NSW, Australia

<sup>8</sup>Lambert Initiative for Cannabinoid Therapeutics, University of Sydney, NSW, Australia

<sup>9</sup>Sansom Institute for Health Research, University of South Australia, Australia

<sup>10</sup>Dept of Medical Oncology, Calvary Mater Newcastle, NSW, Australia

<sup>11</sup>Central West Cancer Care Centre, Orange Health Service, NSW, Australia

<sup>12</sup>Dept of Medical Oncology, Royal North Shore Hospital, NSW, Australia

<sup>13</sup>Kolling Institute of Medical Research, NSW, Australia

<sup>14</sup>Mid North Coast Cancer Institute, Coffs Harbour Hospital, NSW, Australia

<sup>15</sup>Illawarra Shoalhaven Cancer and Haematology Network, Wollongong Hospital, NSW, Australia

## Keywords

Cannabis, cannabidiol, chemotherapy-induced nausea and vomiting, randomized trial, antiemetic

**Word count – Abstract - 273, Body - 4139**

## ABSTRACT

**Introduction** Chemotherapy-induced nausea and vomiting (CINV) remains an important issue for patients receiving chemotherapy despite guideline consistent antiemetic therapy. Trials using delta-9-Tetrahydrocannabinol-rich (THC) products demonstrate limited antiemetic effect, significant adverse events, and flawed study design. Trials using cannabinoid-rich (CBD) products demonstrate improved efficacy and psychological adverse event profile. No definitive trials have been conducted to support the use of cannabinoids

for this indication, nor has the potential economic impact of incorporating such regimens into the Australian healthcare system been established. CannabisCINV aims to assess the efficacy, safety and cost-effectiveness of adding *TN-TC11M*, an oral cannabidiol-rich THC/CBD extract to guideline-consistent anti-emetics in the secondary prevention of CINV.

**Methods and analysis** The current multi-centre, 1:1 randomised cross-over, placebo-controlled pilot study will recruit 80 adult patients with any malignancy, experiencing CINV during moderate to highly emetogenic chemotherapy despite guideline consistent antiemetics. Patients receive oral *TN-TC11M* (2.5/2.5mg) capsules or placebo capsules TDS on day -1 to day 5 of cycle A of chemotherapy, followed by the alternative drug regimen during Cycle B of chemotherapy, and the preferred drug regimen during cycle C. The primary endpoint is the proportion of subjects attaining a complete response to CINV. Secondary and tertiary endpoints include regimen tolerability, impact on quality of life and health system resource use. The primary assessment tool is patient diaries, which are filled from day -1 to day 5. A subsequent randomised placebo-controlled parallel phase III trial will recruit a further 250 patients.

**Ethics and dissemination** The protocol was approved by ethics review committees for all participating sites. Results will be disseminated in peer-reviewed journals and at scientific conferences.

**Trial registration number** Pre-results, ACTRN number 12616001036404

### Strengths and limitations of the study

#### Strengths

- ◆ Largest and most definitive randomised double-blind placebo-controlled trial of cannabis for secondary prevention of CINV
- ◆ First study to assess the impact on health resource use and cost-effectiveness of cannabis within the Australian health system
- ◆ Utility of patient-reported outcomes
- ◆ Self-titrating dose of THC/CBD

#### Limitations

- ◆ Primary outcome measure (complete response) does not include nausea assessment, to ensure comparability with other CINV trials

## INTRODUCTION

Chemotherapy-induced nausea and vomiting (CINV) remains a significant cause of morbidity in oncology patients despite the best current antiemetic prophylaxis<sup>1</sup>.

The Multinational Association of Supportive Care in Cancer (MASCC) has published guidelines which recommend a standardised regimen of a 5-HT<sub>3</sub> receptor antagonist, with dexamethasone, and for most regimens an NK-1 antagonist for optimal antiemetic prophylaxis of moderate or high emetic risk<sup>2</sup>. Even amongst patients receiving guideline-consistent antiemetic prophylaxis, contemporary observational studies of moderate or highly emetogenic chemotherapy found that 46-57% experienced significant nausea, and 9-37% experienced vomiting<sup>3-6</sup>.

### Cannabinoids for chemotherapy-induced nausea and vomiting

The mechanism of delayed nausea and vomiting is incompletely understood, but may involve non-serotonergic receptors including the cannabinoid CB<sub>1</sub> receptor, with a potential role for cannabis products in its amelioration<sup>7</sup>. There is limited evidence of the efficacy of cannabis products for the prevention and treatment of CINV<sup>8</sup>. Whilst several studies have been carried out using smoked marijuana or synthetic oral tetra-hydrocannabinol medicines (THC: *Dronabinol*, *Nabilone*) for treating CINV, most showed limited efficacy, were inadequately powered and utilized outdated control antiemetic arms<sup>9</sup>.

The major limitations of current oral THC-rich cannabinoids for this indication are unpredictable gastrointestinal absorption, poor bioavailability, delayed onset of action, and inability to rapidly self-titrate the dose for nausea control depending on tolerance<sup>9</sup>. Furthermore, THC-only medications can be limited in their therapeutic potential by their intoxicating and disorientating central nervous system effects at the higher doses often needed to control nausea and vomiting<sup>9</sup>. CBD is known to

1  
2  
3 counteract the psychiatric adverse effects of THC, and has inherent anxiolytic properties<sup>10</sup>. The  
4 addition of CBD to THC should ameliorate the intoxicating effects of THC, and allow delivery of  
5 higher therapeutic doses, without increasing the overall intoxication, paranoia and euphoria  
6 associated with THC, with diminished potential for abuse<sup>11</sup>.

7 Nabiximols (*Sativex*; GW Pharmaceuticals, UK) is a THC/CBD cannabis extract derived from the  
8 *Cannabis sativa* plant containing THC and CBD in defined and near-equal amounts, and presented as  
9 a buccal spray<sup>11</sup>. A published small pilot double-blind randomised trial of nabiximols for secondary  
10 prevention of CINV found substantial efficacy, high patient acceptability, and manageable side  
11 effects<sup>12</sup>. In this study, 16 patients who experienced CINV after moderately emetogenic  
12 chemotherapy, despite prophylaxis with a guideline-consistent anti-emetic regimen<sup>12</sup>, were  
13 randomised to nabiximols or placebo. Participants received up to 8.1mg THC/7.5mg CBD over 2  
14 hours, then up to 21.6mg THC/20mg CBD every 24 hours for 5 x 24 hour periods. In the nabiximols  
15 group, the mean dose per 24 hours was 13mg THC (range 5.4-13.5)/12mg CBD (range 5-12.5) and  
16 the median duration was 3 days (range 1-5). The short dose titration was tolerated in 86% receiving  
17 nabiximols, with one patient discontinuing because of transient psychiatric effects. Adverse effects  
18 were experienced in 86% receiving nabiximols and 67% receiving placebo. Substantial efficacy was  
19 observed, with complete response in 71% vs 22%, (difference 49% (95% CI 1%, 75%)), absence of  
20 delayed emesis in 71% vs 22%, and nausea in 57% vs 22%, however no difference in acute nausea  
21 nor vomiting<sup>12</sup>. Nabiximols is licenced for the indication of neurospasticity in Multiple Sclerosis, but  
22 is not commercially available in Australia, and is not available for use in our proposed trial. There is a  
23 paucity of data on the cost-effectiveness of nabiximols outside of Multiple Sclerosis<sup>13</sup>.

24 This study will use a novel oral THC/CBD capsule formulation (*TN-TC11M*, Tilray). The product is  
25 intended to provide equivalent systemic exposures to THC and CBD as nabiximols and was  
26 formulated for a consistent and reproducible pharmacokinetic profile, allowing patients to self-  
27 titrate as needed without a concern for a delayed onset. The product will be dosed similarly to the  
28 Duran study, commencing 24 hours prior to chemotherapy to confirm tolerability.

## 31 HYPOTHESIS

### 32 Primary hypothesis

33 We hypothesise that the addition of *TN-TC11M* to standard guideline-based antiemetics will  
34 improve the control of CINV, leading to improved quality of life. The potential resource implications  
35 are of higher CINV regimen drug costs, but reduced costs of the management of refractory CINV  
36 through the reduced need for rescue medications and reduced hospitalisation.

## 39 METHODS AND ANALYSIS

40 The Cannabis for Chemotherapy Induced Nausea and Vomiting (CannabisCINV) trial is an Australian-  
41 based, double-blind, placebo-controlled, two-stage randomised controlled trial. The primary aim is  
42 to determine the efficacy of adding an oral cannabidiol-rich THC extract (*TN-TC11M*) for secondary  
43 prevention of CINV after failure of a guideline consistent prophylactic anti-emetic regimen.

### 45 Study objectives

46 The primary objective of this study is to compare, amongst patients randomised to *TN-TC11M* or  
47 placebo, the ability to control emesis and nausea, as determined by:

- 48 ♦ The proportion of patients achieving a 'complete response' during the overall phase of  
49 treatment (0 – 120 hours), defined as no emesis and no use of rescue medications

50 The pilot study (cross-over) and definitive trial (parallel) will use different methods of analysis as  
51 outlined in the statistical analysis section.

52  
53 The secondary objectives are to compare, amongst patients randomised to *TN-TC11M* or placebo:

- 54 ♦ Efficacy

- Proportions of patients during acute (0 – 24 hours), delayed (24 – 120 hours) and overall (0 – 120 hours) phases of cycles A, B and C with (i) complete response, (ii) no emesis (vomiting or dry retching), (iii) no significant nausea, defined as degree of nausea <2 out of 10 using an 11-point rating scale, and (iv) no use of rescue medications
- Number of emetic episodes during 0 – 120 hours of cycles A, B and C
- ◆ Cannabinoid-related and other adverse events
  - Endpoint: Proportions with specified cannabinoid-related and other adverse events (structured checklist, CTCAE)
- ◆ Health-related quality of life
  - Endpoint: Summary scales (nausea, vomiting) of Functional Living Index-Emesis, and all items of AQOL-8D
- ◆ Regimen's acceptability
  - Endpoint: Adherence (patient diaries, pill counts), preference

The tertiary and correlative objectives are:

- ◆ To compare health system resource use and costs between randomised groups
  - Endpoint: Health system resource use and costs
- ◆ To model the cost-effectiveness of cannabinoid therapy compared to placebo or other anti-emesis alternatives, for prevention of CINV, from the perspective of the healthcare system
  - Endpoint: Health outcomes relative to costs

### **Trial oversight and monitoring**

The CannabisCINV trial is a collaboration between the Chris O'Brien Lifehouse; the National Health and Medical Research Council (NHMRC) Clinical Trials Centre, University of Sydney; and the Lambert Initiative for Cannabinoid Therapeutics, University of Sydney.

The University of Sydney is the study sponsor. The NHMRC Clinical Trials Centre will be responsible for trial coordination, monitoring, site audits, management, data acquisition and statistical analysis. Safety and feasibility endpoints will be reviewed at 3-monthly intervals by the Independent Data and Safety Monitoring Committee (IDSMC) during both the pilot and phase III trial. The IDSMC will assess the rate of serious adverse events (SAEs) (graded  $\geq 3$  by CTCAE criteria) and accrual, with no pause in recruitment planned. Consideration will be given to altering aspects of the study if:

- ◆ The accrual rate is insufficient to complete the study in a reasonable timeframe
- ◆ The rate of SAEs in the oral *TN-TC11M* arm is unacceptably high compared with the placebo arm
- ◆ Medical or ethical reasons emerge affecting continued performance of the study

Protocol amendments can only be made by the Trial Management Committee and must be approved by the institutional Human Research Ethics Committee (HREC) prior to implementation.

### **Patient and public involvement**

Consumer representatives were involved in the development of this trial. The primary and secondary outcomes of this study, including adverse events, are patient reported outcomes, emphasising the focus of this study on patient priorities, experience and preferences. Results of this study will be disseminated to study participants through peer reviewed journals and at scientific conferences.

### **Trial design**

The protocol consists of a pilot phase II, double-blinded, randomised, placebo-controlled cross-over study followed by a planned definitive phase III, blinded, randomised, parallel, placebo-controlled trial (see figure 1). The pilot trial will be conducted at 10 sites across the state of NSW, Australia, in both tertiary referral centres and regional centres in outpatient comprehensive cancer care units. A list of the study sites can be accessed from the Australia and New Zealand Clinical Trials Registry (ANZCTR).



Figure 1

**Inclusion criteria**

Patients who fulfil all of the following characteristics will be considered eligible for enrolment;

- ◆ Adult patients with any malignancy, and
- ◆ Receiving moderate to highly emetogenic intravenous chemotherapy (Day 1) in a 14 or 21-day cycle, and
- ◆ Experienced significant CINV, defined as requiring  $\geq 1$  dose of rescue medication for vomiting or distress by nausea, and/or  $\geq$  moderate nausea on a 5-point rating scale, at any time during the current chemotherapy regimen despite guideline consistent anti-emetics, and
- ◆ Planned for at least 2 further cycles of the same chemotherapy regimen, and
- ◆ ECOG performance status of 2 or less.

**Exclusion criteria**

Patients with the following characteristics will be excluded from study enrolment:

- ◆ Symptomatic central nervous system/leptomeningeal disease, gastro-intestinal tract obstruction or disease-related nausea or vomiting requiring daily antiemetic therapy
- ◆ Oral chemotherapy during study treatment (eg. oral capecitabine)
- ◆ Radiotherapy to the brain, abdomen or pelvis within the week prior to commencing study treatment, or planned during study treatment
- ◆ Contra-indication to cannabinoid treatment
  - Unstable cardiovascular disease (uncontrolled hypertension, unstable ischaemic heart disease, unstable congestive cardiac failure)
  - History of epilepsy or recurrent seizures
  - History of schizophrenia, other psychotic illness, severe personality disorder, suicidal ideation, or other significant psychiatric disorder, other than depression associated with the underlying condition
  - Substance use disorder (ICD-10 criteria of abuse or dependence) to alcohol, opioids, benzodiazepines, cannabis or illicit stimulants
  - Unwilling/unable to avoid driving or operating heavy machinery during and for up to 72 hours after taking study medication
  - Concerns regarding safe storage of medication
- ◆ Cannabis or cannabinoid-based medications within 30 days of study or unwilling to abstain for the duration of the study
- ◆ Prior hypersensitivity or intolerable adverse reaction to cannabis or cannabinoid-based medications, 5HT<sub>3</sub> antagonist, dexamethasone or NK<sub>1</sub> antagonist
- ◆ Pregnancy, lactation, or inadequate contraception. Women must be post-menopausal, infertile, or use a reliable means of contraception. Women of childbearing potential must have a negative pregnancy test done within 7 days prior to registration. Men must have been surgically sterilised or use a (double if required) barrier method of contraception.

**Investigational medical product*****TN-TC11M***

This study will use a novel oral THC/CBD capsule formulation ('*TN-TC11M*', Tilray) derived from *Cannabis Sativa L.* extract. It contains Delta-9-Tetrahydrocannabinol (THC) and Cannabidiol (CBD) in a 1:1 ratio, with each oral capsule containing 2.5mg THC and 2.5mg CBD. This is intended to provide equivalent systemic exposures to THC and CBD as those obtained from nabiximols (a single dose of nabiximols which comprises 2.7mg THC and 2.5mg CBD). In contrast to nabiximols, TN-CT11M was formulated for a consistent and reproducible pharmacokinetic profile, allowing patients to self-titrate as needed without a concern for a delayed onset. Investigational product will be dosed

similarly to the Duran study<sup>12</sup>, and administration will commence 24 hours prior to chemotherapy to confirm tolerability.

### Placebo

The placebo will be in white capsules, identical in appearance to that of the active treatment.

### Randomisation, allocation concealment and double-blind conditions

Randomisation will be performed centrally using minimization, with stratification by chemotherapy emetogenic risk (moderate vs high by MASCC criteria) and by site.

Pharmaceutical Packaging Professionals (PPP) will store and distribute the drug on behalf of the study sponsor to all participating sites upon receipt of all drug order forms.

### Background treatment

All patients will receive antiemetics including 5HT3 antagonist, corticosteroid, and (where indicated) NK1 antagonist; according to a pre-specified choice of regimen consistent with guidelines from eviQ Cancer Treatments Online<sup>14</sup> and/or MASCC guidelines for optimal anti-emetic prophylaxis of chemotherapy<sup>2</sup>.

The following rescue therapies are permitted:

- ◆ Lorazepam, eg 1mg PO bd (twice a day) prn (when required)
- ◆ Metoclopramide, eg 10mg PO tds (three times a day) prn
- ◆ Haloperidol, eg 0.5 – 1mg PO tds prn
- ◆ Prochlorperazine, eg 5 – 10mg PO tds prn, 25mg sup PR (per rectum) q8h prn
- ◆ Olanzapine, eg 5mg PO bd or 10mg PO mane for 3 days

Note:

- ◆ 5HT3 antagonists should only be used when other rescue therapies have failed

### Recruitment and consent

Patient screening and enrolment undertaken at participating sites will be overseen by the site principal investigator and performed by trained study personnel. A screening log will document all eligible patients screened and approached along with reasons for any exclusions. Patients will provide written informed consent prior to study enrolment.

### Pilot study

The phase II pilot trial (N=80) will be a multi-site, 1:1 randomised, double-blind, placebo-controlled trial (Figure 1). The dosing regimen will be similar to that used in the nabiximiols study by Duran et al described above, which was shown to be well tolerated and effective, however patients will also receive study drug for 24 hours prior to chemotherapy to confirm tolerability. It will utilise a crossover design and a significance level of 10% to increase efficiency, and allow patients to nominate a preferred drug in the final cycle.

In the pilot study, during chemotherapy cycle A, subjects will be randomised to receive oral *TN-TC11M* capsules (2.5/2.5mg) TDS from day -1 to 5, or identical placebo capsules, in addition to guideline consistent anti-emetics. For cycle B, subjects will cross-over to receive the alternative formulation in the same schedule.

On treatment, patients will be able to self-titrate their *TN-TC11M*/placebo exposure based on tolerance, with a maximum does of 30mg/30mg per day (12 tablets) (Table 1). Following cycle B, subjects are asked to nominate their preferred regimen after cycle B, and where relevant will receive that agent with cycle C.

**Table 1: On treatment schedule with dose modifications**

| Day | Time | Dose | Dose titration | Maximum dose |
|-----|------|------|----------------|--------------|
|-----|------|------|----------------|--------------|

|    |                                                                   |              |                                                                                                                                               | per 24-hour period                            |
|----|-------------------------------------------------------------------|--------------|-----------------------------------------------------------------------------------------------------------------------------------------------|-----------------------------------------------|
| -1 | Mane                                                              | 1 capsule    | N/A                                                                                                                                           | 5 capsules<br>12.5mg<br>TCH/CBD or<br>placebo |
|    | Midi<br>(at least 4 hours after<br>previous dose)                 | 2 capsules   | Miss dose if intoxicated                                                                                                                      |                                               |
|    | Nocte<br>(at least 4 hours after<br>previous dose)                | 1–2 capsules | Miss dose if intoxicated<br><br>Reduce dose by 1 capsule if<br>previous dose not tolerated<br><br>Maintain dose if previous dose<br>tolerated |                                               |
| 1  | 60 min prior to<br>chemotherapy                                   | 1–2 capsules | Miss dose if intoxicated<br><br>Reduce dose by 1 capsule if<br>previous dose not tolerated                                                    | 8 capsules<br>20mg TCH/CBD<br>or placebo      |
|    | Immediately after<br>completion of Day 1<br>chemotherapy infusion | 1–3 capsules | Maintain dose if previous dose<br>tolerated, with nausea control                                                                              |                                               |
|    | 4 hours after<br>completion of Day 1<br>chemotherapy infusion     | 1–3 capsules | Increase dose by 1 capsule if<br>previous dose tolerated, but<br>inadequate nausea control                                                    |                                               |
| 2  | Continue tds<br>Mane<br>Midi<br>Nocte                             | 1–4 capsules | Miss dose if intoxicated                                                                                                                      | 12 capsules<br>30mg TCH/CBD<br>or placebo     |
| 3  |                                                                   |              | Reduce dose by 1 capsule if<br>previous dose not tolerated                                                                                    |                                               |
| 4  |                                                                   |              | Maintain dose if previous dose<br>tolerated, with nausea control                                                                              |                                               |
| 5  | Mane                                                              | 1–4 capsules | Increase dose by 1 capsule if<br>previous dose tolerated, but<br>inadequate nausea control                                                    | 8 capsules                                    |
|    | Take final dose Midi<br>Day 5                                     |              |                                                                                                                                               | 20mg TCH/CBD<br>or placebo                    |

Table 1 shows the starting dose will be 1 capsule PO on the morning of Day -1, with the next scheduled dose of 2 capsules (if tolerated, at midday), followed by 2 capsules that evening (if tolerated). On Day 1 subjects receive 1–2 capsules 60 minutes prior to chemotherapy infusion, followed by 1–3 capsules immediately after completion of Day 1 infusional chemotherapy, then 1–3 capsules 4 hours after completion of Day 1 infusional chemotherapy. On Days 2-5 subjects take 1-4 tablets TDS, with instruction to dose-titrate according to intoxication, tolerance of prior dose, and nausea control. The final dose is at midday on Day 5, with no further treatment until Day -1 of the next chemotherapy cycle.

### Definitive study

The definitive randomised phase 3 study (N=250) will assess the efficacy of the addition of TN-TC11M to guideline consistent anti-emetics as secondary prevention of CINV. It will have a parallel group design, to reduce bias given the possibility of carry-over effect from cross-over in subsequent cycles, and to investigate longer-term efficacy over multiple chemotherapy cycles.

In the definitive study, during cycle A, subjects will receive oral *TN-TC11M* capsules (2.5/2.5mg) TDS from day -1 to 5, or identical placebo capsules, in the same treatment schedule (see table 1). For cycle B (and C if relevant), subjects will re-commence treatment with the investigational product on their maximum tolerated dose from the previous cycle, with further scope to self-titrate according to symptoms.

## Data acquisition

The participant will be instructed on the use of the patient diary, which has been designed for this study, to record;

- ◆ Nausea (past 24-hour period), recorded using an 11-point rating scale
- ◆ Date, time and type of rescue medication used
- ◆ Vomiting and dry retching episodes

The patient diary will be completed by the patient. There will be daily assessment of patients on days 1 to 6 of each cycle to ensure:

- ◆ Study treatments are taken appropriately
- ◆ Accurate records in the patient diary
- ◆ Completion of structured checklist of cannabinoid-specific adverse events
- ◆ Advice is provided regarding management of any adverse events

Trial data will be recorded on the (e)CRFs provided and will be monitored by clinical trials program staff from the NHMRC Clinical Trials Centre.

## Unblinding and post-study care

Following completion of trial treatment, patients who have experienced benefit and require ongoing treatment with the same chemotherapy regimen may be eligible for ongoing access to *TN-TC11M*, free of charge, contingent on unblinding performed by an unblinded statistician.

## STATISTICAL CONSIDERATIONS

### Sample size estimation

The estimated sample size for the pilot trial is 80 patients (40 per arm), using a primary endpoint of complete response to the study drug and placebo during cycle A and B of treatment. Utilizing a cross-over design, randomising patients to either study drug followed by placebo or placebo followed by study drug, will have 80% power at a 2-sided significance level of 10% to detect a 20% difference in discordant responses (response on one intervention, but not the other). Accrual is expected to take 12 months. The 20% difference is based on the assumption that 42% of patients on the study drug will respond compared with 22% on placebo, and that the responders in the placebo group will respond/not respond equally on the study drug (11% respond on each).

The estimated sample size for the definitive trial is 250 patients (125 per arm), using a primary endpoint of complete response during cycle A of study treatment. A sample size of 250 patients provides 80% power at 2-sided 5% level of significance to detect improvement in complete response from 22% to 42.5%. Accrual is expected to take 2.5 years.

The sample size for each trial will allow for a drop-out/ineligibility rate of 20%.

The current evidence suggests that this level of improvement is both worthwhile and feasible.

## Statistical analysis

### Pilot study

Analyses will be conducted using intention to treat (ITT) principles. The primary analyses will include all patients who were randomised. Missing values will not be imputed. The results will be examined for differential effect in the two periods and if necessary, the data from cycle A will be analysed separately.

The primary outcome is complete response. The primary analysis will be a comparison of the proportion of patients with a complete response between the two treatments over cycle A and cycle B, using McNemar's test. In the event that there is differential drop-out between period, or a period by treatment interaction, the results from the first period will be analysed using a chi-square test. Analyses to assess period by treatment interaction will use Generalised Estimating Equations (GEEs) to account for the correlation within a patient. Secondary analyses to adjust for any baseline variables will also use GEEs. All tests will use a two-sided significance level of 10%.

## Definitive study

The primary analyses will include all randomised patients using ITT principles, and compare the proportion of patients with complete response in the two treatment arms during the overall phase (0-120 hours) of cycle A, using a Chi-square test. Secondary analyses adjusting for baseline variables will use GEEs. Binary secondary outcomes will be analysed as for the primary outcome. Count data will be analysed using a Generalised Linear Model with a Poisson distribution. Cannabinoid-related adverse events and measures of adherence will be analysed with a chi-square test or two-sample t-test or just listed depending on numbers. All tests will use a two-sided significance level of 5%.

## Health economic analysis

A within-trial and modelled economic evaluation will be undertaken to determine the incremental cost-effectiveness of oral cannabinoid therapy compared to placebo and other anti-emetic therapies, from a health system perspective.

For the within-trial analysis, resource use will be identified and measured from trial case report forms (for hospitalisations), and through linkage to Medicare claims data for outpatient visits (MBS) and prescribed medicines (PBS). Australian unit costs will be applied to the resource usage data (e.g. Australian Refined Diagnostic Related Groups (AR-DRG), and Medicare scheduled fees using the most recent reference year). For the modelled evaluation, resource use will be taken from the trial data for cannabinoid and placebo therapies, and supplemented with published estimates of resource use and costs for alternative 'usual care' anti-emetic therapies.

The definitive study will employ a health economic analysis which will use the proportion of patients with 'complete response' (i.e. participants with no emesis and no use of rescue medications, consistent with the primary endpoint); quality of life as measured by the FLIE with 5-day recall and AQOL-8D instruments<sup>15</sup>, and quality-adjusted survival. Quality-adjusted survival time will be used to quantify the incremental effectiveness of cannabinoid treatment. Quality-adjusted survival will be calculated by applying utility weights for quality of life derived from the AQOL-8D utility instrument to survival data using established methods. In addition, we will conduct a sensitivity analysis to determine the incremental costs to achieve an outcome of no significant nausea, no emesis and no use of rescue medications.

Two cost-effectiveness outcomes will be reported: 1) the incremental cost per additional complete responder (trial primary endpoint) at 30 days after last dose of study drug, and 2) the incremental cost per quality-adjusted life year (QALY) gained at 12 months, using extrapolated data. These will be expressed as incremental cost-effectiveness ratios and plotted on a cost-effectiveness plane. Bootstrapping will be used to estimate a distribution around costs and health outcomes, and to calculate confidence intervals around incremental cost-effectiveness ratios<sup>16</sup>. A cost-effectiveness acceptability curve (CEAC) will be plotted, providing information about the probability that the intervention is cost-effective given the Australian Government's willingness to pay for a QALY gained<sup>17</sup>. One-way, two-way and probabilistic sensitivity analyses will be undertaken for relevant variables, including cost of the study drug.

## ETHICS AND DISSEMINATION

### Approval and patient-informed consent

This protocol was approved at the Sydney Local Health District ethics review committee (Royal Prince Alfred Hospital zone) and ethics review committees for all participating sites.

In Australia, the study will be conducted according to the Note for Guidance on Good Clinical Practice (CPMP/ICH/135/95) annotated with TGA comments (Therapeutic Goods Administration DSEB July 2000) and in compliance with applicable laws and regulations. The study will be performed in accordance with the NHMRC Statement on Ethical Conduct in Research Involving Humans 2007 –

updated May 2015, the NHMRC Australian Code for the Responsible Conduct of Research 2007, and the principles laid down by the World Medical Assembly in the Declaration of Helsinki 2008.

To this end, no patient will be recruited to the study until all the necessary approvals have been obtained and the patient has provided written informed consent. Further, the investigator shall comply with the protocol, except when a protocol deviation is required to eliminate immediate hazard to a participant. In this circumstance the NHMRC CTC, principal investigator and HREC must be advised immediately.

## TRIAL STATUS

Patient enrolment for the pilot study commenced in November 2016 at the Chris O'Brien Lifehouse in NSW, Australia, with the 10<sup>th</sup> NSW site opened in June 2017. To date 49 patients have been enrolled, with anticipated pilot study enrolment completion by 3<sup>rd</sup> quarter 2018.

**Acknowledgements** Special study personnel, patients and their families

**Contributors** PG, PSH, MS, NL, JS, IM, IO, DJA, CG, AK, were responsible for study concept (grant authors). PG, PSH, MS, NL, JS, IM, IO, DJA, CG, AK, RML, NW were responsible for protocol development. PG, AT, AM, NW, AW, CH, AK, MS, CG, PF, SC, KB and MA were responsible for study conduct.

**Funding** NSW Department of Health, drug supply by Tilray

**Drug supply** Tilray

**Protocol version** 2.0, 9<sup>th</sup> June 2017

**Data access** Data access will be restricted to NHMRC Clinical Trials Centre staff

**Competing interests** No authors disclosed a relevant conflict of interest

**Ethics approval** Sydney Local Health District ethics review committee (Royal Prince Alfred Hospital zone).

**Dissemination policy** Results will be communicated by a writing committee appointment by the trial management committee and disseminated in peer-reviewed journals and at scientific conferences

**Provenance and peer review** Not commissioned; externally peer reviewed

**Data sharing statement** This is a protocol paper, and no analysed results are available at this time

**Open access** This is an open access article distributed in accordance with the Creative Commons Attribution Non-Commercial (CC BY-NC 4.0) license, which permits others to distribute, remix, adapt, build upon this work non-commercially, and license their derivative works on different terms, provided the original work is properly cited and the use is non-commercial. See <http://creativecommons.org/licenses/by-nc/4.0/>

## REFERENCES

1. Navari RM, Aapro M. Antiemetic prophylaxis for chemotherapy-induced nausea and vomiting. *New England Journal of Medicine* 2016;374(14):1356-67.
2. Multinational Association of Supportive Care in Cancer. MASCC/ESMO Antiemetic guideline 2016 [Available from: <http://www.mascc.org/antiemetic-guidelines> accessed 21 Aug 2017.
3. Roila F, Herrstedt J, Aapro M, et al. Guideline update for MASCC and ESMO in the prevention of chemotherapy-and radiotherapy-induced nausea and vomiting: results of the Perugia consensus conference. *Annals of Oncology* 2010;21(suppl\_5):v232-v43.
4. Gilmore JW, Peacock NW, Gu A, et al. Antiemetic guideline consistency and incidence of chemotherapy-induced nausea and vomiting in US community oncology practice: INSPIRE Study. *Journal of Oncology Practice* 2013;10(1):68-74.
5. Molassiotis A, Saunders MP, Valle J, et al. A prospective observational study of chemotherapy-related nausea and vomiting in routine practice in a UK cancer centre. *Supportive Care in Cancer* 2008;16(2):201-08.

- 1  
2  
3 6. Aapro M, Molassiotis A, Dicato M, et al. The effect of guideline-consistent antiemetic therapy  
4 on chemotherapy-induced nausea and vomiting (CINV): the Pan European Emesis Registry  
5 (PEER). *Annals of Oncology* 2012;23(8):1986-92.
- 6  
7 7. Frame D. Best practice management of CINV in oncology patients: I. Physiology and treatment  
8 of CINV. Multiple neurotransmitters and receptors and the need for combination therapeutic  
9 approaches. *The journal of supportive oncology* 2010;8(2 Suppl 1):5-9.
- 10  
11 8. Penington DG. Medical cannabis: time for clear thinking. *Medical Journal of Australia*  
12 2015;202(2):74-76.
- 13  
14 9. Kramer JL. Medical marijuana for cancer. *CA: a cancer journal for clinicians* 2015;65(2):109-  
15 22.
- 16  
17 10. Bhattacharyya S, Morrison PD, Fusar-Poli P, et al. Opposite effects of  $\Delta$ -9-  
18 tetrahydrocannabinol and cannabidiol on human brain function and psychopathology.  
19 *Neuropsychopharmacology* 2010;35(3):764.
- 20  
21 11. Allsop DJ, Copeland J, Lintzeris N, et al. Nabiximols as an agonist replacement therapy during  
22 cannabis withdrawal: a randomized clinical trial. *JAMA psychiatry* 2014;71(3):281-91.
- 23  
24 12. Duran M, Pérez E, Abanades S, et al. Preliminary efficacy and safety of an oromucosal  
25 standardized cannabis extract in chemotherapy-induced nausea and vomiting. *British journal of*  
26 *clinical pharmacology* 2010;70(5):656-63.
- 27  
28 13. Herzog S, Shanahan M, Grimison P, et al. Systematic Review of the Costs and Benefits of  
29 Prescribed Cannabis-Based Medicines for the Management of Chronic Illness: Lessons from  
30 Multiple Sclerosis. *PharmacoEconomics* 2017 doi: 10.1007/s40273-017-0565-6
- 31  
32 14. Cancer Institute of New South Wales. Prevention of chemotherapy induced nausea and  
33 vomiting 2017 [updated 30 Aug 2017. Available from: [https://www.eviq.org.au/clinical-  
34 resources/side-effect-and-toxicity-management/gastrointestinal/7-prevention-of-  
35 chemotherapy-induced-nausea-and-vomiting](https://www.eviq.org.au/clinical-resources/side-effect-and-toxicity-management/gastrointestinal/7-prevention-of-chemotherapy-induced-nausea-and-vomiting) accessed 30 Oct 2017.
- 36  
37 15. Richardson J, Iezzi A, Khan MA, et al. Validity and reliability of the Assessment of Quality of  
38 Life (AQoL)-8D multi-attribute utility instrument. *The Patient-Patient-Centered Outcomes*  
39 *Research* 2014;7(1):85-96.
- 40  
41 16. Campbell M, Torgerson D. Bootstrapping: estimating confidence intervals for cost-  
42 effectiveness ratios. *Qjm* 1999;92(3):177-82.
- 43  
44 17. Fenwick E, O'Brien BJ, Briggs A. Cost-effectiveness acceptability curves—facts, fallacies and  
45 frequently asked questions. *Health economics* 2004;13(5):405-15.

46  
47  
48 Figure 1: Study schema for pilot phase II, double-blinded, randomised, placebo-controlled  
49 cross-over study and planned definitive phase III, blinded, randomised, parallel, placebo-  
50 controlled trial.

1  
2  
3  
4  
5  
6  
7  
8  
9  
10  
11  
12  
13  
14  
15  
16  
17  
18  
19  
20  
21  
22  
23  
24  
25  
26  
27  
28  
29  
30  
31  
32  
33  
34  
35  
36  
37  
38  
39  
40  
41  
42  
43  
44  
45  
46  
47  
48  
49  
50  
51  
52  
53  
54  
55  
56  
57  
58  
59  
60



Figure 1 - Study schema

157x115mm (150 x 150 DPI)





SPIRIT 2013 Checklist: Recommended items to address in a clinical trial protocol and related documents\*

| Section/item                      | Item No | Description                                                                                                                                                                                                                                                                                       |
|-----------------------------------|---------|---------------------------------------------------------------------------------------------------------------------------------------------------------------------------------------------------------------------------------------------------------------------------------------------------|
| <b>Administrative information</b> |         |                                                                                                                                                                                                                                                                                                   |
| Title                             | 1       | Descriptive title identifying the study design, population, interventions, and, if applicable, trial acronym (page 1)                                                                                                                                                                             |
| Trial registration                | 2a      | Trial identifier and registry name. If not yet registered, name of intended registry (page 2)                                                                                                                                                                                                     |
|                                   | 2b      | All items from the World Health Organization Trial Registration Data Set                                                                                                                                                                                                                          |
| Protocol version                  | 3       | Date and version identifier (Page 10)                                                                                                                                                                                                                                                             |
| Funding                           | 4       | Sources and types of financial, material, and other support (page 10)                                                                                                                                                                                                                             |
| Roles and responsibilities        | 5a      | Names, affiliations, and roles of protocol contributors (pages 1 and 10)                                                                                                                                                                                                                          |
|                                   | 5b      | Name and contact information for the trial sponsor (page 1)                                                                                                                                                                                                                                       |
|                                   | 5c      | Role of study sponsor and funders, if any, in study design; collection, management, analysis, and interpretation of data; writing of the report; and the decision to submit the report for publication, including whether they will have ultimate authority over any of these activities (page 9) |
|                                   | 5d      | Composition, roles, and responsibilities of the coordinating centre, steering committee, endpoint adjudication committee, data management team, and other individuals or groups overseeing the trial, if applicable (see Item 21a for data monitoring committee) (page 4)                         |
| <b>Introduction</b>               |         |                                                                                                                                                                                                                                                                                                   |
| Background and rationale          | 6a      | Description of research question and justification for undertaking the trial, including summary of relevant studies (published and unpublished) examining benefits and harms for each intervention (page 2 and 3)                                                                                 |
|                                   | 6b      | Explanation for choice of comparators (page 3)                                                                                                                                                                                                                                                    |
| Objectives                        | 7       | Specific objectives or hypotheses (page 3 and 4)                                                                                                                                                                                                                                                  |

1 Trial design 8 Description of trial design including type of trial (eg, parallel group,  
2 crossover, factorial, single group), allocation ratio, and framework (eg,  
3 superiority, equivalence, noninferiority, exploratory) (pages 4, 7 and 8)  
4  
5  
6

7 **Methods: Participants, interventions, and outcomes**  
8

9 Study setting 9 Description of study settings (eg, community clinic, academic hospital)  
10 and list of countries where data will be collected. Reference to where  
11 list of study sites can be obtained (page 4)  
12

13 Eligibility criteria 10 Inclusion and exclusion criteria for participants. If applicable, eligibility  
14 criteria for study centres and individuals who will perform the  
15 interventions (eg, surgeons, psychotherapists) (pages 4 and 5)  
16

17 Interventions 11a Interventions for each group with sufficient detail to allow replication,  
18 including how and when they will be administered (pages 5, 6 and 7)  
19

20 11b Criteria for discontinuing or modifying allocated interventions for a  
21 given trial participant (eg, drug dose change in response to harms,  
22 participant request, or improving/worsening disease) (pages 6 and 7)  
23

24 11c Strategies to improve adherence to intervention protocols, and any  
25 procedures for monitoring adherence (eg, drug tablet return,  
26 laboratory tests) (pages 7 and 8)  
27

28 11d Relevant concomitant care and interventions that are permitted or  
29 prohibited during the trial (page 6)  
30

31 Outcomes 12 Primary, secondary, and other outcomes, including the specific  
32 measurement variable (eg, systolic blood pressure), analysis metric  
33 (eg, change from baseline, final value, time to event), method of  
34 aggregation (eg, median, proportion), and time point for each  
35 outcome. Explanation of the clinical relevance of chosen efficacy and  
36 harm outcomes is strongly recommended (page 3, 4, 7, 8 and 9)  
37

38 Participant 13 Time schedule of enrolment, interventions (including any run-ins and  
39 timeline washouts), assessments, and visits for participants. A schematic  
40 diagram is highly recommended (see Figure) (page 4, figure 1, pages  
41 6, 7 and 8)  
42  
43  
44

45 Sample size 14 Estimated number of participants needed to achieve study objectives  
46 and how it was determined, including clinical and statistical  
47 assumptions supporting any sample size calculations (page 8 and 9)  
48

49 Recruitment 15 Strategies for achieving adequate participant enrolment to reach  
50 target sample size (page 4)  
51

52 **Methods: Assignment of interventions (for controlled trials)**  
53

54 Allocation:  
55  
56  
57  
58  
59  
60

|    |                |     |                                                                         |
|----|----------------|-----|-------------------------------------------------------------------------|
| 1  |                |     |                                                                         |
| 2  | Sequence       | 16a | Method of generating the allocation sequence (eg, computer-             |
| 3  | generation     |     | generated random numbers), and list of any factors for stratification.  |
| 4  |                |     | To reduce predictability of a random sequence, details of any planned   |
| 5  |                |     | restriction (eg, blocking) should be provided in a separate document    |
| 6  |                |     | that is unavailable to those who enrol participants or assign           |
| 7  |                |     | interventions (page 6)                                                  |
| 8  |                |     |                                                                         |
| 9  | Allocation     | 16b | Mechanism of implementing the allocation sequence (eg, central          |
| 10 | concealment    |     | telephone; sequentially numbered, opaque, sealed envelopes),            |
| 11 | mechanism      |     | describing any steps to conceal the sequence until interventions are    |
| 12 |                |     | assigned (page 6)                                                       |
| 13 |                |     |                                                                         |
| 14 | Implementation | 16c | Who will generate the allocation sequence, who will enrol participants, |
| 15 |                |     | and who will assign participants to interventions (page 6)              |
| 16 |                |     |                                                                         |
| 17 | Blinding       | 17a | Who will be blinded after assignment to interventions (eg, trial        |
| 18 | (masking)      |     | participants, care providers, outcome assessors, data analysts), and    |
| 19 |                |     | how (page 5 and 6)                                                      |
| 20 |                |     |                                                                         |
| 21 |                | 17b | If blinded, circumstances under which unblinding is permissible, and    |
| 22 |                |     | procedure for revealing a participant's allocated intervention during   |
| 23 |                |     | the trial (page 8)                                                      |
| 24 |                |     |                                                                         |
| 25 |                |     |                                                                         |

### Methods: Data collection, management, and analysis

|    |                 |     |                                                                          |
|----|-----------------|-----|--------------------------------------------------------------------------|
| 26 |                 |     |                                                                          |
| 27 |                 |     |                                                                          |
| 28 | Data collection | 18a | Plans for assessment and collection of outcome, baseline, and other      |
| 29 | methods         |     | trial data, including any related processes to promote data quality (eg, |
| 30 |                 |     | duplicate measurements, training of assessors) and a description of      |
| 31 |                 |     | study instruments (eg, questionnaires, laboratory tests) along with      |
| 32 |                 |     | their reliability and validity, if known. Reference to where data        |
| 33 |                 |     | collection forms can be found, if not in the protocol (page 7 and 8)     |
| 34 |                 |     |                                                                          |
| 35 |                 | 18b | Plans to promote participant retention and complete follow-up,           |
| 36 |                 |     | including list of any outcome data to be collected for participants who  |
| 37 |                 |     | discontinue or deviate from intervention protocols (page 7 and 8)        |
| 38 |                 |     |                                                                          |
| 39 | Data            | 19  | Plans for data entry, coding, security, and storage, including any       |
| 40 | management      |     | related processes to promote data quality (eg, double data entry;        |
| 41 |                 |     | range checks for data values). Reference to where details of data        |
| 42 |                 |     | management procedures can be found, if not in the protocol (page 8)      |
| 43 |                 |     |                                                                          |
| 44 |                 |     |                                                                          |
| 45 | Statistical     | 20a | Statistical methods for analysing primary and secondary outcomes.        |
| 46 | methods         |     | Reference to where other details of the statistical analysis plan can be |
| 47 |                 |     | found, if not in the protocol (pages 8 and 9)                            |
| 48 |                 |     |                                                                          |
| 49 |                 | 20b | Methods for any additional analyses (eg, subgroup and adjusted           |
| 50 |                 |     | analyses) (pages 8 and 9)                                                |
| 51 |                 |     |                                                                          |
| 52 |                 | 20c | Definition of analysis population relating to protocol non-adherence     |
| 53 |                 |     | (eg, as randomised analysis), and any statistical methods to handle      |
| 54 |                 |     | missing data (eg, multiple imputation) (pages 8 and 9)                   |
| 55 |                 |     |                                                                          |
| 56 |                 |     |                                                                          |
| 57 |                 |     |                                                                          |
| 58 |                 |     |                                                                          |
| 59 |                 |     |                                                                          |
| 60 |                 |     |                                                                          |

**Methods: Monitoring**

- 1  
2  
3  
4  
5  
6  
7  
8  
9  
10  
11  
12  
13  
14  
15  
16  
17  
18  
19  
20  
21  
22
- |                 |     |                                                                                                                                                                                                                                                                                                                                                |
|-----------------|-----|------------------------------------------------------------------------------------------------------------------------------------------------------------------------------------------------------------------------------------------------------------------------------------------------------------------------------------------------|
| Data monitoring | 21a | Composition of data monitoring committee (DMC); summary of its role and reporting structure; statement of whether it is independent from the sponsor and competing interests; and reference to where further details about its charter can be found, if not in the protocol. Alternatively, an explanation of why a DMC is not needed (page 4) |
|                 | 21b | Description of any interim analyses and stopping guidelines, including who will have access to these interim results and make the final decision to terminate the trial (pages 8 and 9)                                                                                                                                                        |
| Harms           | 22  | Plans for collecting, assessing, reporting, and managing solicited and spontaneously reported adverse events and other unintended effects of trial interventions or trial conduct (page 4)                                                                                                                                                     |
| Auditing        | 23  | Frequency and procedures for auditing trial conduct, if any, and whether the process will be independent from investigators and the sponsor (page 4)                                                                                                                                                                                           |

**Ethics and dissemination**

- 23  
24  
25  
26  
27  
28  
29  
30  
31  
32  
33  
34  
35  
36  
37  
38  
39  
40  
41  
42  
43  
44  
45  
46  
47  
48  
49  
50  
51  
52  
53  
54  
55  
56  
57  
58  
59  
60
- |                               |     |                                                                                                                                                                                                                                           |
|-------------------------------|-----|-------------------------------------------------------------------------------------------------------------------------------------------------------------------------------------------------------------------------------------------|
| Research ethics approval      | 24  | Plans for seeking research ethics committee/institutional review board (REC/IRB) approval (page 9)                                                                                                                                        |
| Protocol amendments           | 25  | Plans for communicating important protocol modifications (eg, changes to eligibility criteria, outcomes, analyses) to relevant parties (eg, investigators, REC/IRBs, trial participants, trial registries, journals, regulators) (page 9) |
| Consent or assent             | 26a | Who will obtain informed consent or assent from potential trial participants or authorised surrogates, and how (see Item 32) (page 9)                                                                                                     |
|                               | 26b | Additional consent provisions for collection and use of participant data and biological specimens in ancillary studies, if applicable (pages 8 and 9)                                                                                     |
| Confidentiality               | 27  | How personal information about potential and enrolled participants will be collected, shared, and maintained in order to protect confidentiality before, during, and after the trial (page 10)                                            |
| Declaration of interests      | 28  | Financial and other competing interests for principal investigators for the overall trial and each study site (page 9)                                                                                                                    |
| Access to data                | 29  | Statement of who will have access to the final trial dataset, and disclosure of contractual agreements that limit such access for investigators (page 10)                                                                                 |
| Ancillary and post-trial care | 30  | Provisions, if any, for ancillary and post-trial care, and for compensation to those who suffer harm from trial participation (page 8)                                                                                                    |

- 1  
2  
3  
4  
5  
6  
7  
8  
9  
10  
11  
12  
13
- |                         |     |                                                                                                                                                                                                                                                                                                     |
|-------------------------|-----|-----------------------------------------------------------------------------------------------------------------------------------------------------------------------------------------------------------------------------------------------------------------------------------------------------|
| Dissemination<br>policy | 31a | Plans for investigators and sponsor to communicate trial results to participants, healthcare professionals, the public, and other relevant groups (eg, via publication, reporting in results databases, or other data sharing arrangements), including any publication restrictions (pages 2 and 9) |
|                         | 31b | Authorship eligibility guidelines and any intended use of professional writers (Page 10)                                                                                                                                                                                                            |
|                         | 31c | Plans, if any, for granting public access to the full protocol, participant-level dataset, and statistical code (page 10)                                                                                                                                                                           |

## 14 Appendices

- 15  
16  
17  
18  
19  
20  
21  
22
- |                               |    |                                                                                                                                                                                                                 |
|-------------------------------|----|-----------------------------------------------------------------------------------------------------------------------------------------------------------------------------------------------------------------|
| Informed consent<br>materials | 32 | Model consent form and other related documentation given to participants and authorised surrogates                                                                                                              |
| Biological<br>specimens       | 33 | Plans for collection, laboratory evaluation, and storage of biological specimens for genetic or molecular analysis in the current trial and for future use in ancillary studies, if applicable (not applicable) |

---

23 \*It is strongly recommended that this checklist be read in conjunction with the SPIRIT 2013  
24 Explanation & Elaboration for important clarification on the items. Amendments to the  
25 protocol should be tracked and dated. The SPIRIT checklist is copyrighted by the SPIRIT  
26 Group under the Creative Commons "[Attribution-NonCommercial-NoDerivs 3.0 Unported](#)"  
27 license.  
28  
29  
30  
31  
32  
33  
34  
35  
36  
37  
38  
39  
40  
41  
42  
43  
44  
45  
46  
47  
48  
49  
50  
51  
52  
53  
54  
55  
56  
57  
58  
59  
60
